# Supplementary material for: Computationally predicting clinical drug combination efficacy with cancer cell line screens and independent drug action
Source: PubMed Central journal article supplement (PMC7673995; doi:10.1038/s41467-020-19563-6), 2020-11-17
Supplement: 41467_2020_19563_MOESM1_ESM.pdf [file 41467_2020_19563_MOESM1_ESM.pdf]

1 **Supplemental Text for “Computationally predicting clinical drug combination efficacy**  
2 **with cancer cell line screens and independent drug action”**

3 Alexander Ling and R. Stephanie Huang

4 **SUPPLEMENTAL TEXT DESCRIPTION**

5 This file contains supplemental figures, tables, results, discussion, and references that  
6 relate to the findings of the main text but could not be included there due to a lack of space. In  
7 general, the text in this document simply expands on findings and discussions from the main  
8 text without introducing entirely new findings or discussion topics.

9 **SUPPLEMENTAL FIGURES**

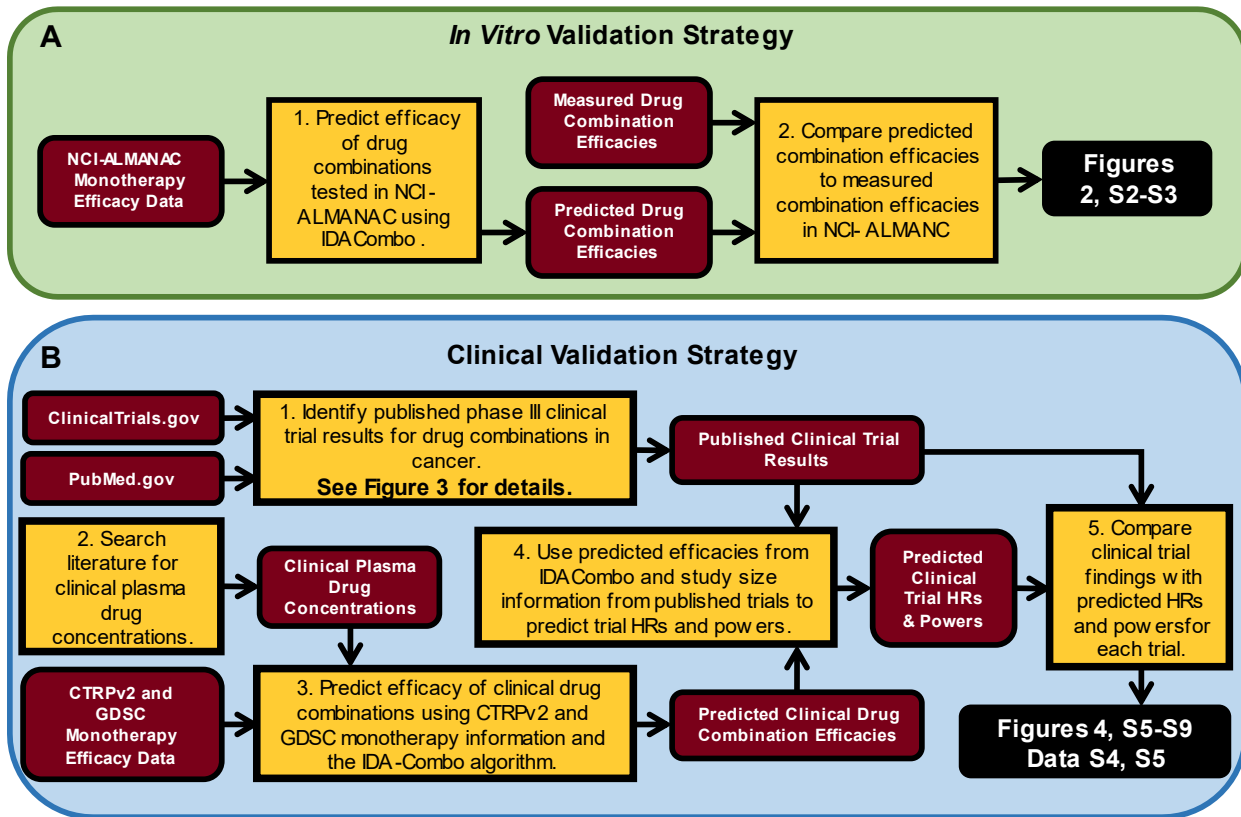

10

11 **Figure S1. Pipelines to validate IDACombo predictions both in vitro and in clinical trial data. A)** In  
12 vitro validation strategy. Monotherapy data from NCI-ALMANAC is used to predict drug combination  
13 efficacies, and these efficacies are compared to the measured combination efficacies that are also in  
14 NCI-ALMANAC. **B)** Clinical trials are systematically identified using ClinicalTrials.gov and PubMed.gov,  
15 and efficacy predictions are made for each treatment in each trial using clinical drug concentrations and  
16 monotherapy cell line data from CTRPv2 and/or GDSC. These predictions are used to estimate hazard  
17 ratios (HRs) and powers for each trial, and these HRs and powers are compared to reported clinical trial  
18 outcomes.

19

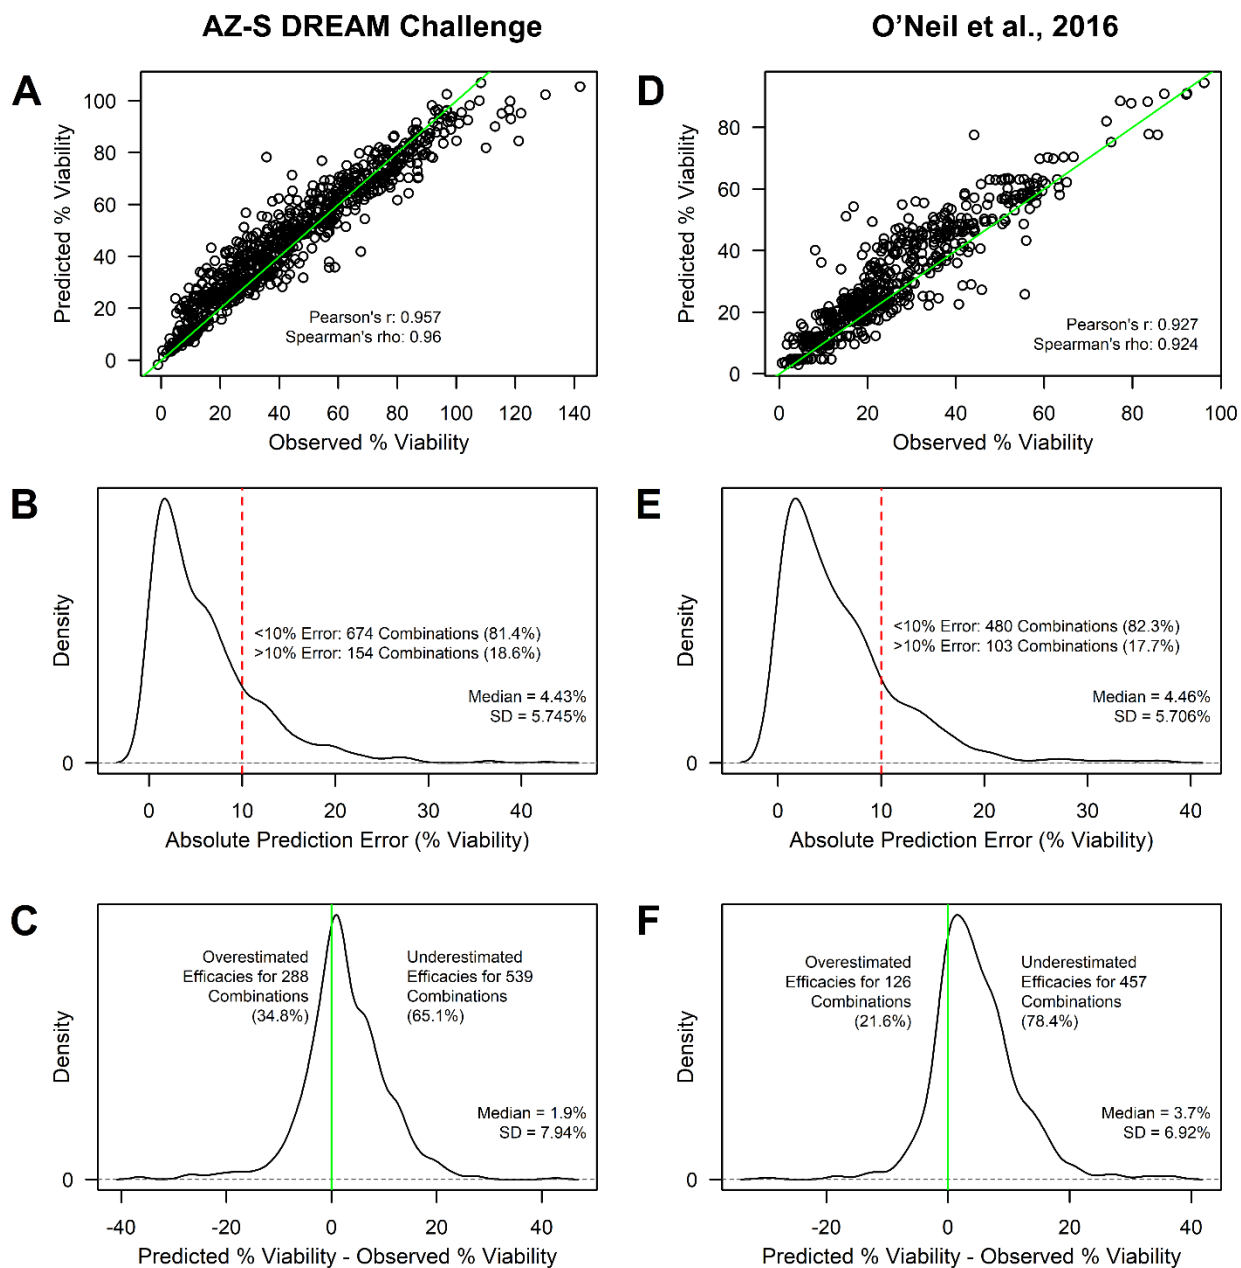

20

21 **Figure S2. Agreement between predicted and observed combination viabilities in the AstraZeneca-Sanger**  
 22 **DREAM Challenge and O'Neil et al., 2016 drug combination datasets. A-C)** Results using the AstraZeneca-  
 23 Sanger DREAM challenge (AZ-S DREAM) drug combination dataset. **D-F)** Results using the O'Neil et al., 2016 drug  
 24 combination dataset. **A&D)** Scatterplot showing high correlation between predicted average percent viability and  
 25 experimentally observed average percent viability for each drug combination in the dataset. Predictions were made  
 26 using monotherapy data from the dataset. The green line is a reference diagonal with slope = 1 and intercept = 0.  
 27 Note that predictions were only made for the maximum concentration tested for each drug. **B&E)** Density plot  
 28 showing that the absolute values of the differences between the predicted percent viabilities and the observed  
 29 percent viabilities for each drug combination are generally below 10%, with >50% of drug combinations having an  
 30 absolute prediction error below 5%. The red line marks a difference of  $\pm 10\%$  viability between predicted and  
 31 observed values. **C&F)** Density plot showing that the differences between the predicted percent viabilities and the  
 32 observed percent viabilities for each drug combination have a slight tendency towards being positive—indicating that  
 33 IDA-Combo underestimates efficacy more often than it overestimates efficacies. Source data are provided with this  
 34 paper.

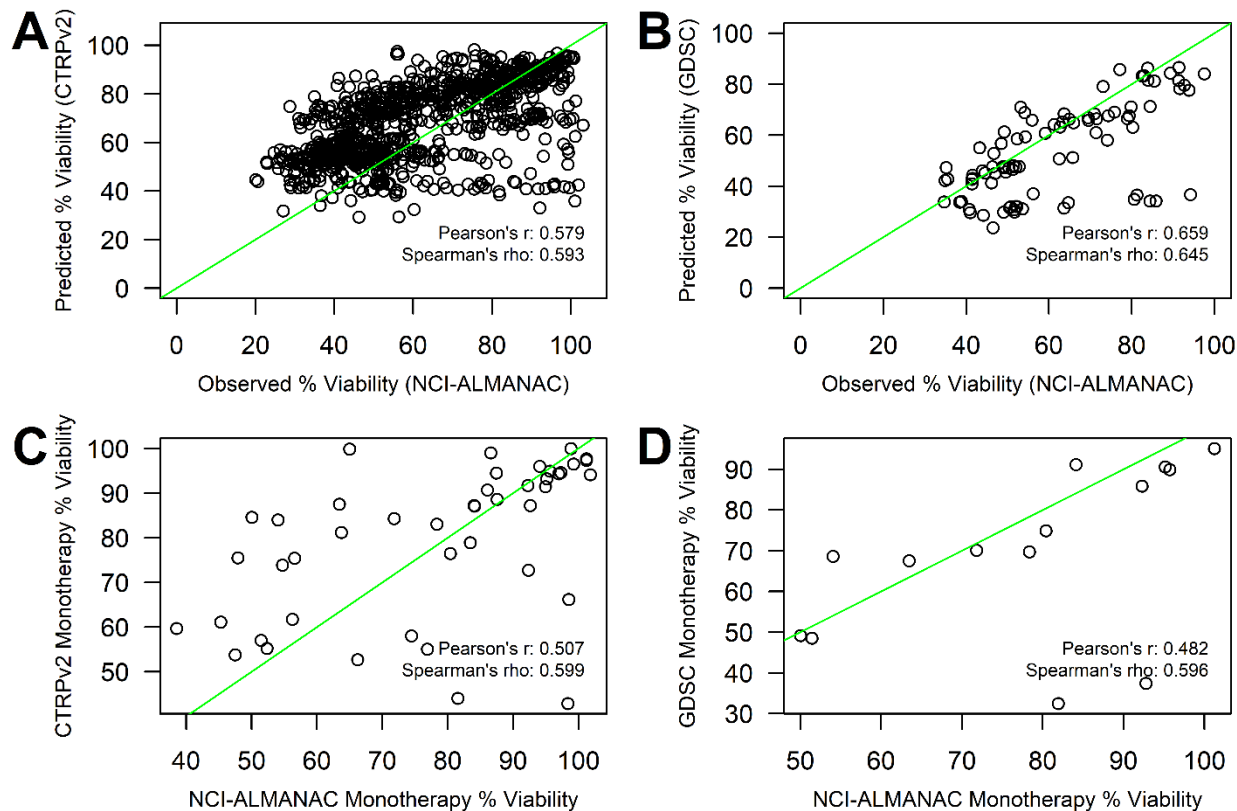

35  
 36 **Figure S3. Agreement between drug combination efficacy predictions made with CTRPv2 or GDSC**  
 37 **and measured efficacies in NCI-ALMANAC A-B)** Scatterplots showing the correlation between drug  
 38 combination mean % viabilities predicted with IDACombo and (A) CTRPv2 or (B) GDSC monotherapy  
 39 data vs measured mean % viabilities for those combinations in NCI-ALMANAC. The green line is a  
 40 reference diagonal with slope = 1 and intercept = 0. Note that CTRPv2 and GDSC predictions were made  
 41 using all available cell lines for each combination in the dataset, so the predicted and measured mean %  
 42 viabilities were produced with different cell line sets. Also note that predictions were only made for the  
 43 maximum tested NCI-ALMANAC concentrations for each drug and that overlapping combinations were  
 44 excluded if the concentration tested in NCI-ALMANAC exceeded the maximum tested concentration in  
 45 CTRPv2 (for A) or GDSC (for B) for any drug in the combination. C-D) Mean monotherapy % viabilities  
 46 for each drug included in at least one of the drug combinations plotted in A or B for C and D respectively.  
 47 Monotherapy viabilities are plotted for C) CTRPv2 vs. NCI-ALMANAC and D) GDSC vs NCI-ALMANAC  
 48 with average viabilities being calculated for all available cell lines in each dataset for each drug. The  
 49 green line is a reference diagonal with slope = 1 and intercept = 0. Note that measured viability averages  
 50 are at the maximum tested NCI-ALMANAC concentrations used for that drug in each combination the  
 51 drug was included in. If the maximum concentration for a drug differed between different combinations  
 52 involving that drug in NCI-ALMANAC, the most commonly used maximum concentration was selected for  
 53 plotting in panels C and D. Source data are provided with this paper.

54

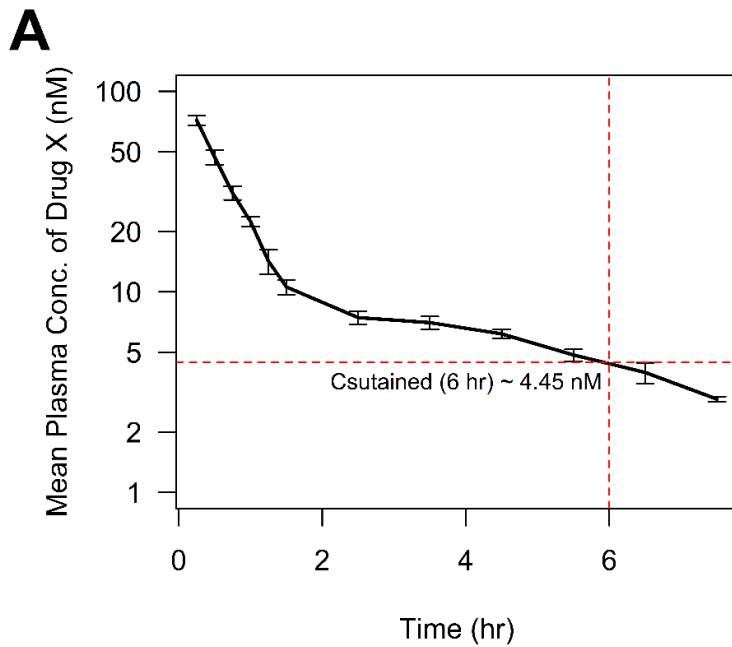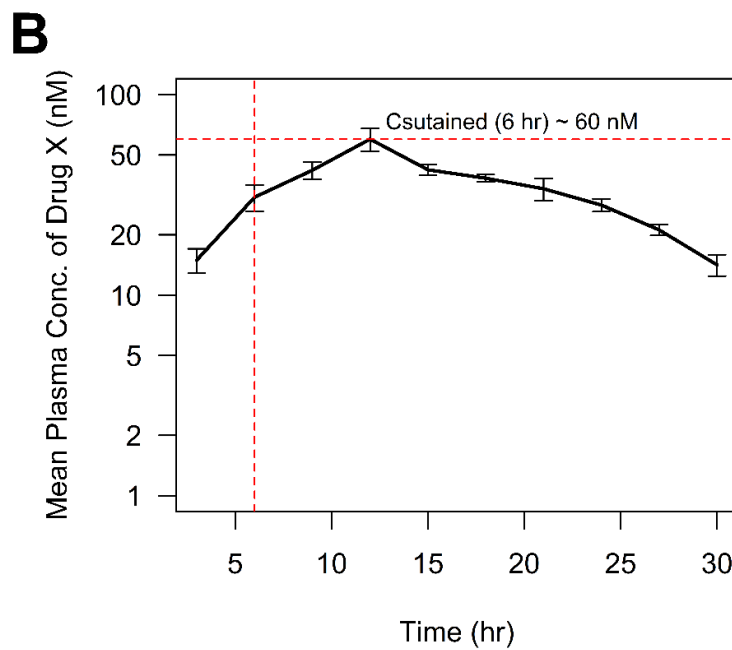

55

56 **Figure S4. Calculating  $C_{sustained,6hr}$  from clinical plasma concentration curves.** This figure gives  
 57 two hypothetical examples to illustrate how  $C_{sustained}$  is calculated from plasma concentration curves  
 58 identified in phase I or II clinical trials. **A)** When mean plasma drug concentrations constantly decrease  
 59 following administration of a drug,  $C_{sustained,6hr}$  is simply the mean plasma concentration at 6 hours  
 60 after drug administration. **B)** When mean plasma drug concentrations continue rising for more than 6  
 61 hours following administration of a drug,  $C_{sustained,6hr}$  is the maximum plasma concentration achieved  
 62 at least 6 hours after drug administration. Error bars represent mean  $\pm$  standard error.

63

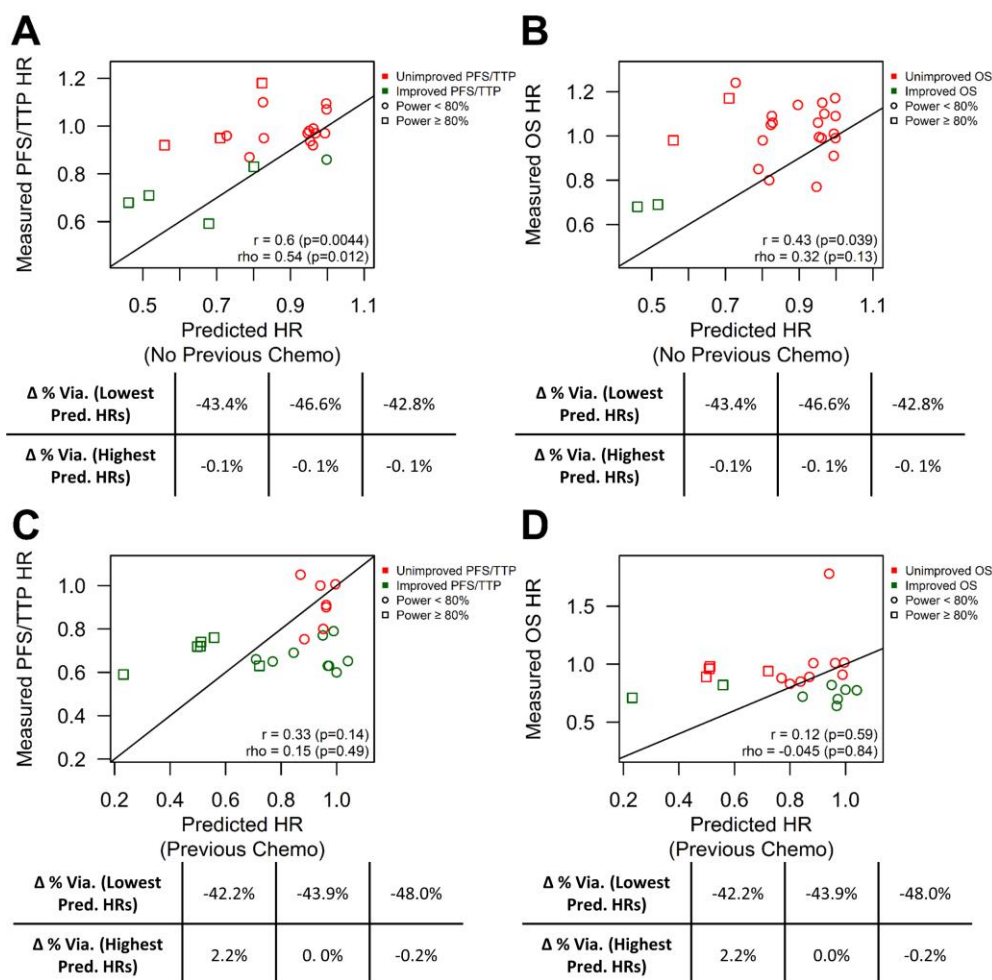

64 **Figure S5. Predicted vs measured hazard ratios for clinical validation analysis.** This figure shows  
 65 how hazard ratios (HRs) predicted with IDACombo (x-axes) compare to HRs reported by the clinical trials  
 66 selected for the clinical trial validation analysis (y-axes). Note that, while this figure includes largely the  
 67 same set of trials used in Figure 4 in the main text, some of those trials are not included in this figure  
 68 because they did not report HRs. Red points represent trials which did not report a HR that was  
 69 statistically less than 1, while green points represent trials that did report a HR that was statistically less  
 70 than 1. Circles represent trials where the power predicted by IDACombo for that trial was <80%, while  
 71 squares represent trials where the predicted power was  $\geq 80\%$ . Pearson's  $r$  and Spearman's  $\rho$  are  
 72 reported alongside two-sided  $p$ -values for whether or not the measured correlation is significantly different  
 73 from 0. **A)** Measured PFS/TTP HRs vs predicted HR in clinical trials where patients had not received  
 74 chemotherapy prior to trial entry. **B)** Measured OS HRs vs predicted HR in clinical trials where patients  
 75 had not received chemotherapy prior to trial entry. **C)** Measured PFS/TTP HRs vs predicted HR in clinical  
 76 trials where patients had received chemotherapy prior to trial entry. **D)** Measured OS HRs vs predicted  
 77 HR in clinical trials where patients had received chemotherapy prior to trial entry. Note that further  
 78 information for these trials and IDACombo's predictions for them is included in Supplementary Data 3.  
 79 The tables below each plot indicate the change in predicted mean viability for the experimental therapy  
 80 vs. the control therapy for the three highest predicted HRs and the three lowest predicted HRs from each  
 81 panel (negative values indicate experimental therapy has lower predicted viability than control therapy).  
 82 Source data are provided with this paper.

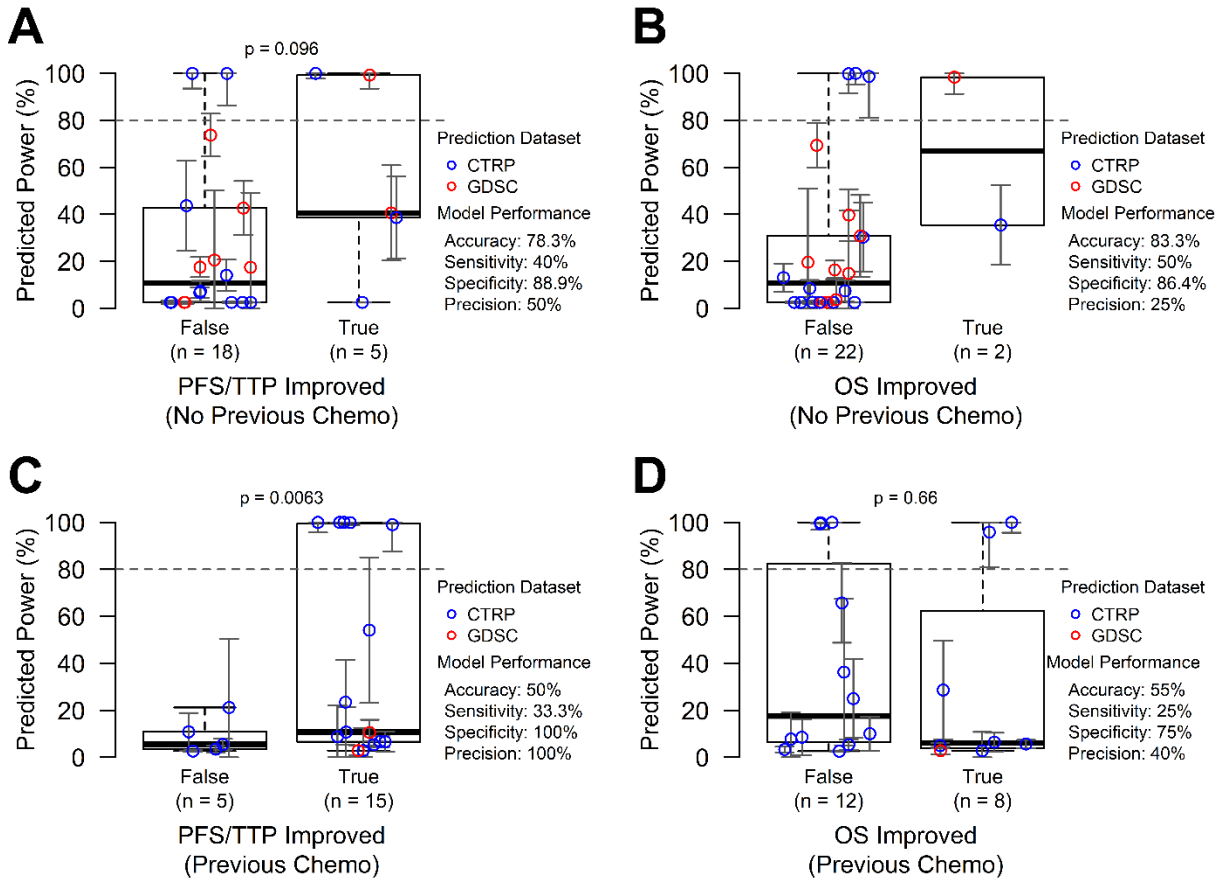

83

84 **Figure S6. Using only cancer-specific cell lines does not improve model performance for clinical**  
 85 **trial power predictions.** Identical to Figure 4, except that predictions were made for each trial using sets  
 86 of cell lines specific to the cancer type being studied in each trial. **A)** Predicted power of each trial in  
 87 previously untreated patients to detect a significant improvement in PFS/TTP at an alpha of 0.05 versus  
 88 whether or not the study actually detected a significant improvement in PFS/TTP. **B)** Predicted power of  
 89 each study in previously untreated patients to detect a significant improvement in OS at an alpha of 0.05  
 90 versus whether or not the study actually detected a significant improvement in OS. **C)** Predicted power of  
 91 each trial in previously treated patients to detect a significant improvement in PFS/TTP at an alpha of  
 92 0.05 versus whether or not the study actually detected a significant improvement in PFS/TTP. **D)**  
 93 Predicted power of each study in previously treated patients to detect a significant improvement in OS  
 94 at an alpha of 0.05 versus whether or not the study actually detected a significant improvement in OS. Error  
 95 bars for each plotted clinical trial power represent mean estimated power  $\pm$  standard error (bounded  
 96 between 0 and 100% power). P values were calculated using one-tailed t-tests. Blue circles indicate  
 97 predictions made using the CTRP dataset, and red circles indicate predictions made using the GDSC dataset.  
 98 Boxplots are plotted so that the lower and upper whiskers indicate the extreme lower and upper values  
 99 respectively, the box boundaries indicate the first and third quartiles, and the center line indicates the  
 100 median. Source data are provided with this paper.

101

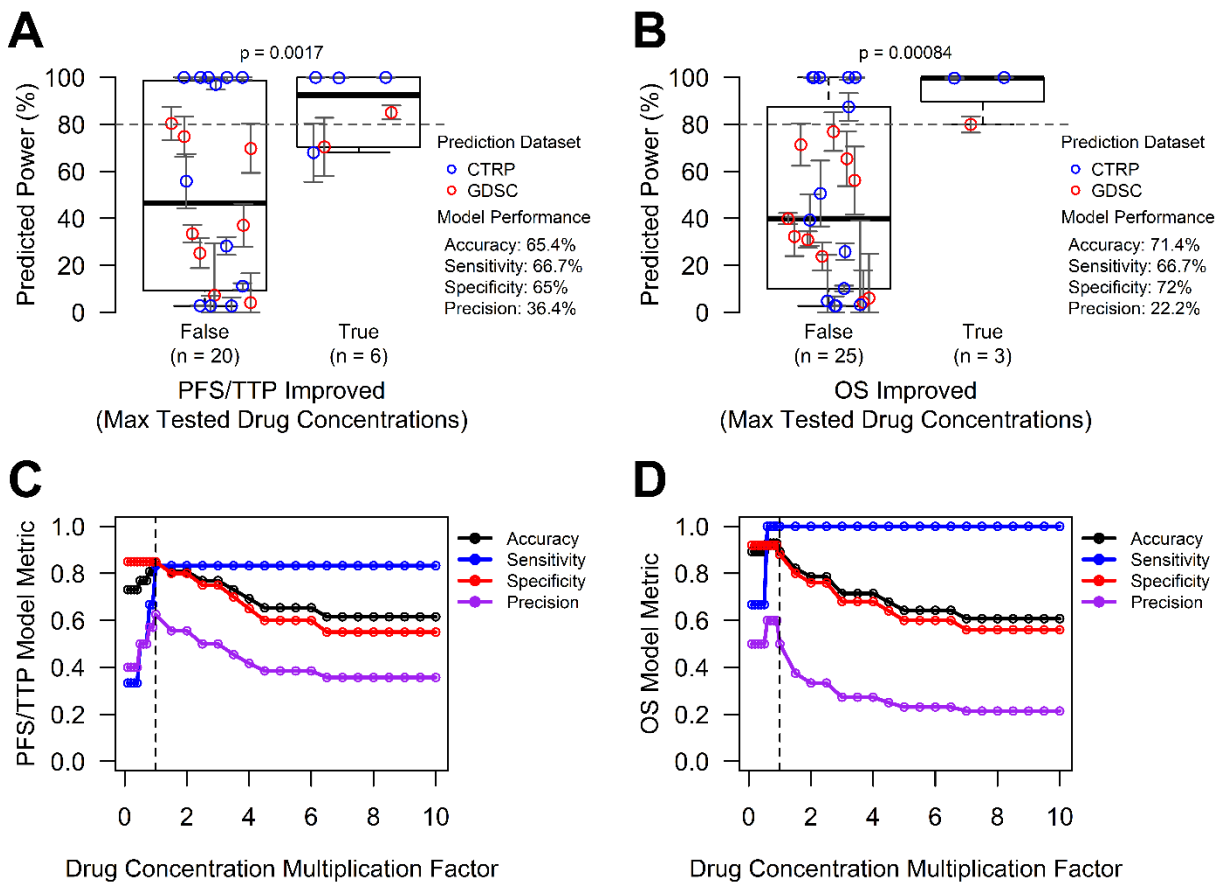

102

103 **Figure S7. Clinical power predictions are dose-dependent. A&B)** Similar to Figure 4A and 4B, all  
 104 available cell lines were used to create predictions of study power for trials in chemo-naïve patients and  
 105 compared to whether or not the trials saw a statistically significant improvement in PFS/TTP **(A)** or OS  
 106 **(B)**. In this figure, however, maximum tested concentrations were used for each drug instead of  
 107 Csustained concentrations. Notably, these predictions with the maximum tested concentration of each  
 108 drug results in much poorer model performance than the Csustained predictions in Figure 4. **C&D)** In an  
 109 effort to determine how sensitive our method is to dose perturbation, power predictions were made for  
 110 each trial in chemo-naïve patients using Csustained drug concentrations which have been multiplied by a  
 111 multiplication factor between 0.1 and 10. Model performance metrics for PFS/TTP **(C)** or OS **(D)**  
 112 were then calculated using predictions from each dose multiplication factor, and those metrics are plotted here.  
 113 Error bars for each plotted clinical trial power represent mean estimated power  $\pm$  standard error (bounded  
 114 between 0 and 100% power). P values in **A** and **B** were calculated using one-tailed t-tests. Blue circles  
 115 indicate predictions made using the CTRP dataset, and red circles indicate predictions made using the GDSC  
 116 dataset. Boxplots are plotted so that the lower and upper whiskers indicate the extreme lower and upper  
 117 values respectively, the box boundaries indicate the first and third quartiles, and the center line indicates  
 118 the median. Source data are provided with this paper.

119

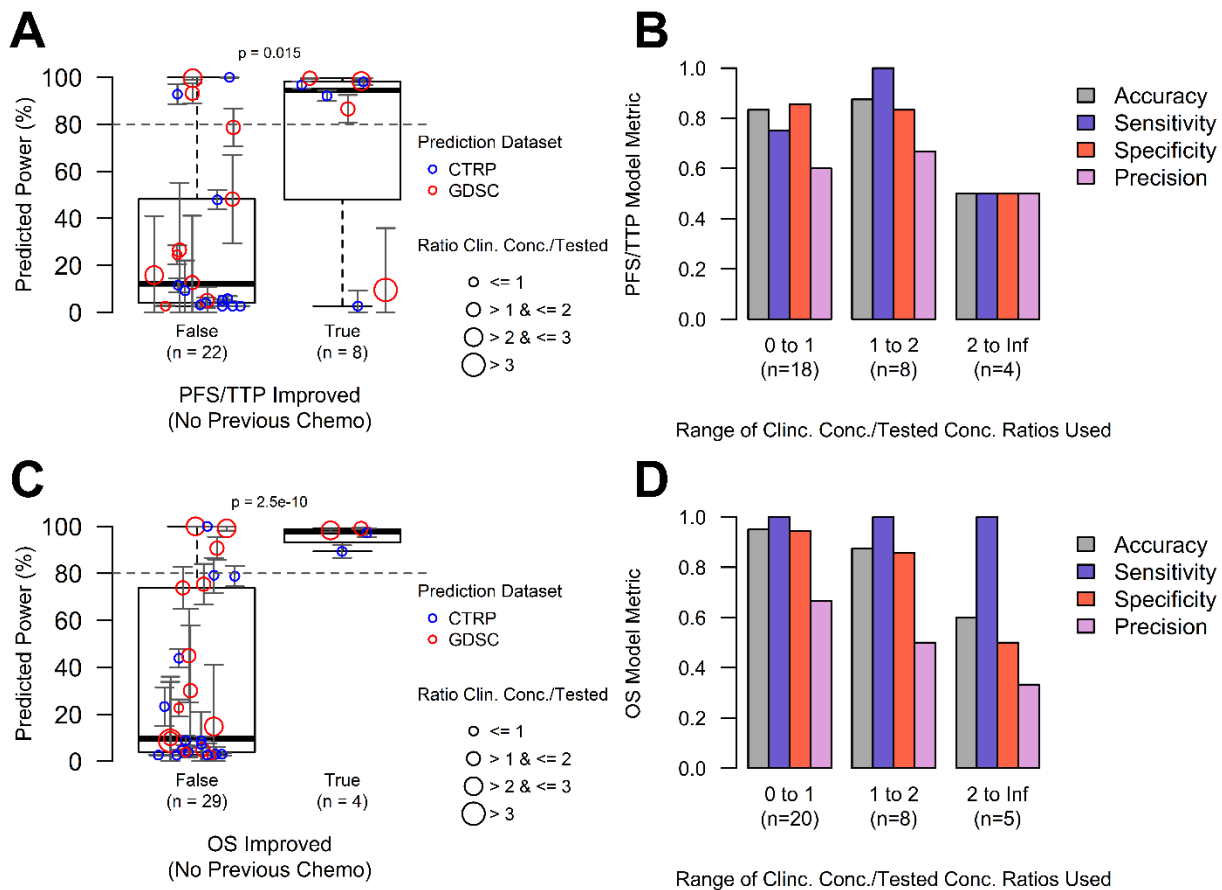

120

121 **Figure S8. IDACombo predictions become less accurate when made using drug concentrations**  
 122 **beyond the tested monotherapy concentration range. A)** Similar to Figure 4A, this plot shows  
 123 predicted clinical trial powers for PFS/TTP in trials with chemo-naïve patients, separated based on  
 124 whether or not the trial actually observed a statistical improvement in PFS/TTP with the test treatment.  
 125 Trial points are sized according to the maximum ratio of the Csustained concentrations used for the drugs  
 126 in the trial to the maximum tested concentrations of those drugs in CTRPv2 or GDSC. Ratios above 1  
 127 indicate that the Csustained concentration is higher than the maximum available concentration in  
 128 CTRPv2 or GDSC. Notably, most of the incorrectly classified trials have ratios > 1 and most of the  
 129 correctly classified trials have ratios < 1. **B)** Barplot showing PFS/TTP model performance for trials with  
 130 chemo-naïve patients that fall within three different ranges of ratios of drug Csustained concentration to  
 131 tested concentration in CTRPv2 or GDSC. Notably, trials with a Csustained/tested concentration ratio > 2  
 132 are predicted much more poorly than trials with a ratio between 0 and 1 or with a ratio between 1 and 2.  
 133 **C)** Same as **A**, except for OS in trials with chemo-naïve patients. **D)** Same as **B**, except for OS in trials  
 134 with chemo-naïve patients. Error bars for each plotted clinical trial power represent mean estimated  
 135 power  $\pm$  standard error (bounded between 0 and 100% power). P values in **A** and **C** were calculated  
 136 using one-tailed t-tests. Blue circles indicate predictions made using the CTRP dataset, and red circles indicate  
 137 predictions made using the GDSC dataset. Boxplots are plotted so that the lower and upper whiskers indicate  
 138 the extreme lower and upper values respectively, the box boundaries indicate the first and third quartiles,  
 139 and the center line indicates the median. Source data are provided with this paper.

140



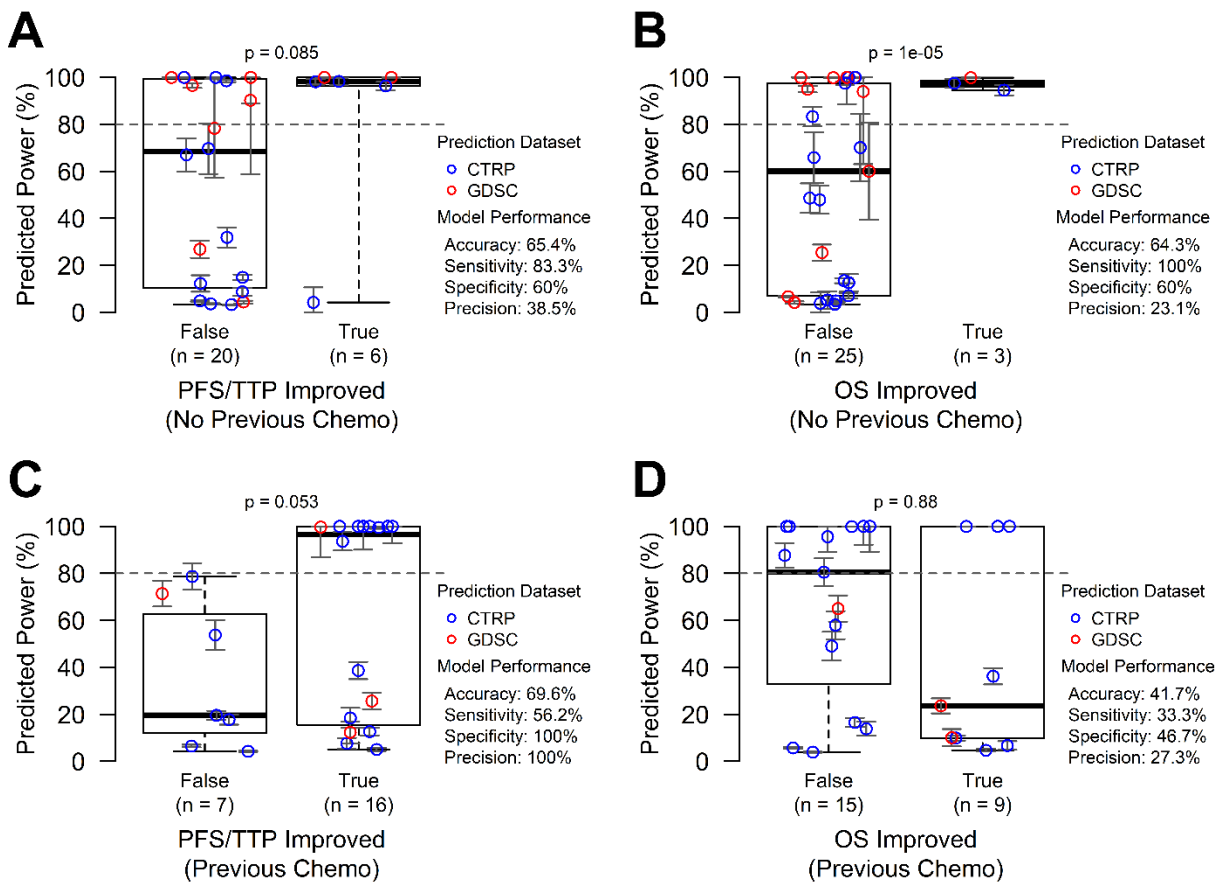

141

142 **Figure S9. Predictions made using Bliss independence are less accurate than those made with**  
 143 **independent drug action.** Power predictions were made for the clinical trials shown in Figure 4, but  
 144 using the Bliss independence model rather than the IDA model. In general, when compared to the IDA  
 145 predictions in Figure 4, Bliss Independence inflates estimated powers, leading to decreased precision,  
 146 specificity, and accuracy while providing marginal improvements in sensitivity. Error bars for each plotted  
 147 clinical trial power represent mean estimated power  $\pm$  standard error (bounded between 0 and 100%  
 148 power). P values were calculated using one-tailed t-tests. Blue circles indicate predictions made using the  
 149 CTRP dataset, and red circles indicate predictions made using the GDSC dataset. Boxplots are plotted so that the  
 150 lower and upper whiskers indicate the extreme lower and upper values respectively, the box boundaries  
 151 indicate the first and third quartiles, and the center line indicates the median. Source data are provided  
 152 with this paper.

153

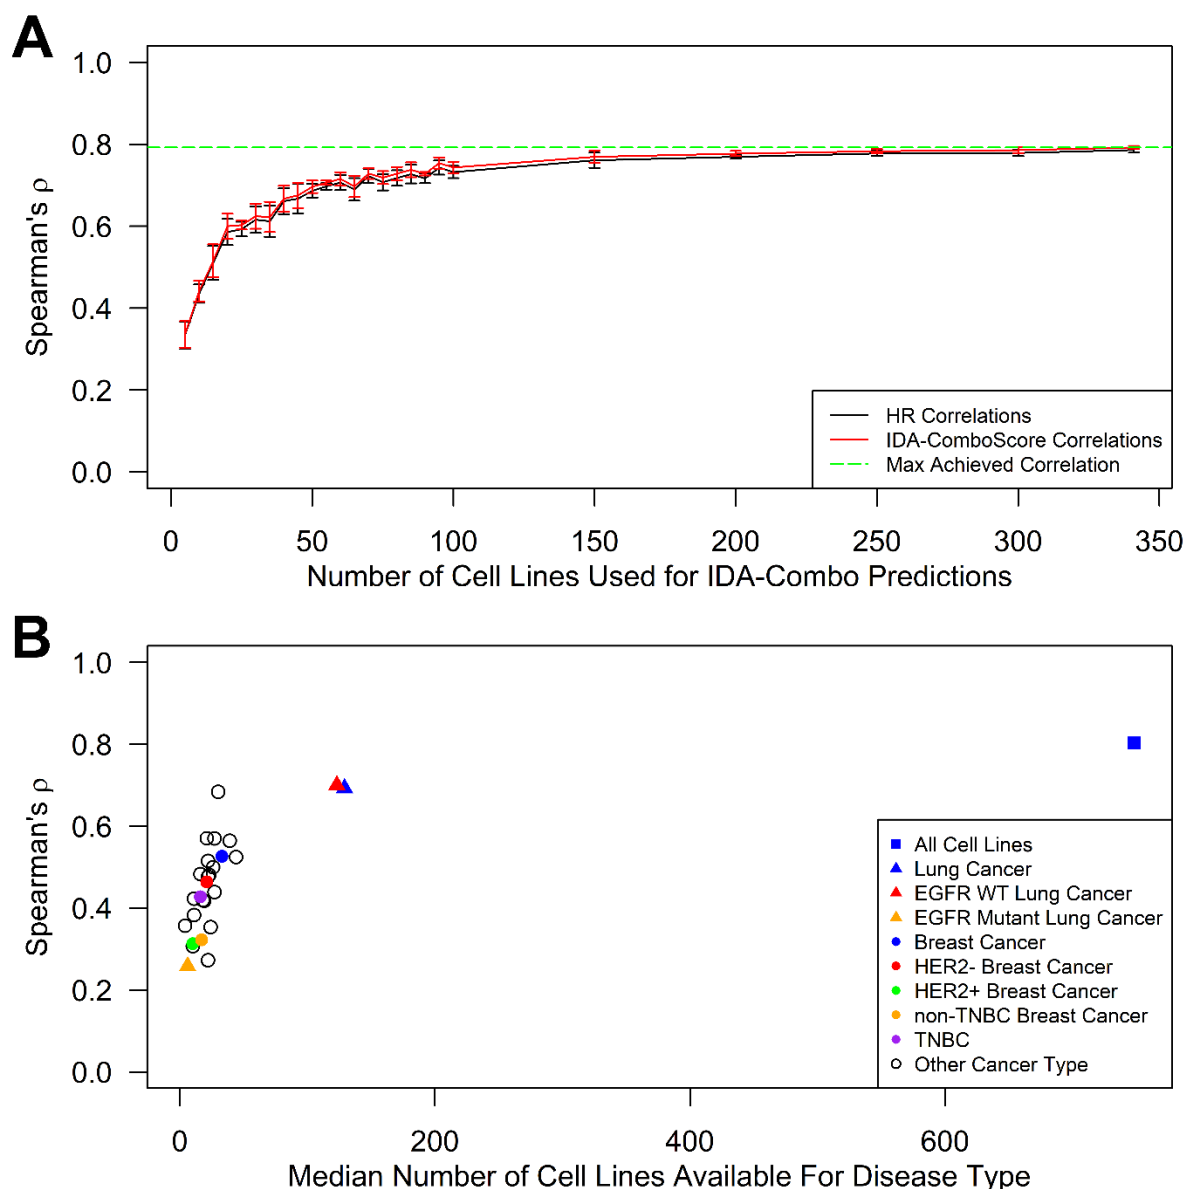

154

155 **Figure S10. IDA-comboscore agreement between CTRPv2 and GDSC is affected by the number of**  
 156 **cell lines available to make predictions with.** In an effort to determine how many cell lines are required  
 157 to estimate drug combination efficacy, IDA-comboscore correlations between CTRPv2 and GDSC are  
 158 plotted versus the number of cell lines used to make those predictions. **A)** IDA-comboscore predictions  
 159 were made using randomly sampled sets of cell lines of varying sizes. Sampling was performed three  
 160 times for each number of cell lines and the mean of each triplicate is plotted with error bars representing  
 161 the standard deviation of the triplicate correlation measurements. Notably, agreement between CTRPv2  
 162 and GDSC decreases rapidly as the number of cell lines is reduced below 50. **B)** Correlations are plotted  
 163 for predictions made using cancer-specific cell lines. Note that the x-axis denotes the median number of  
 164 cell lines available for that cancer type for each drug combination, as the number of cell lines available for  
 165 each cancer type varies from drug to drug. Subsets of breast cancer and lung cancer are highlighted in  
 166 the plot. Note that for both panels **A** and **B**, correlations were only calculated for drug combinations that  
 167 used drugs for which their clinical doses were available in both CTRP and GDSC so as to avoid  
 168 calculating correlations between predictions made with different drug concentrations between the two  
 169 datasets. Source data are provided with this paper.

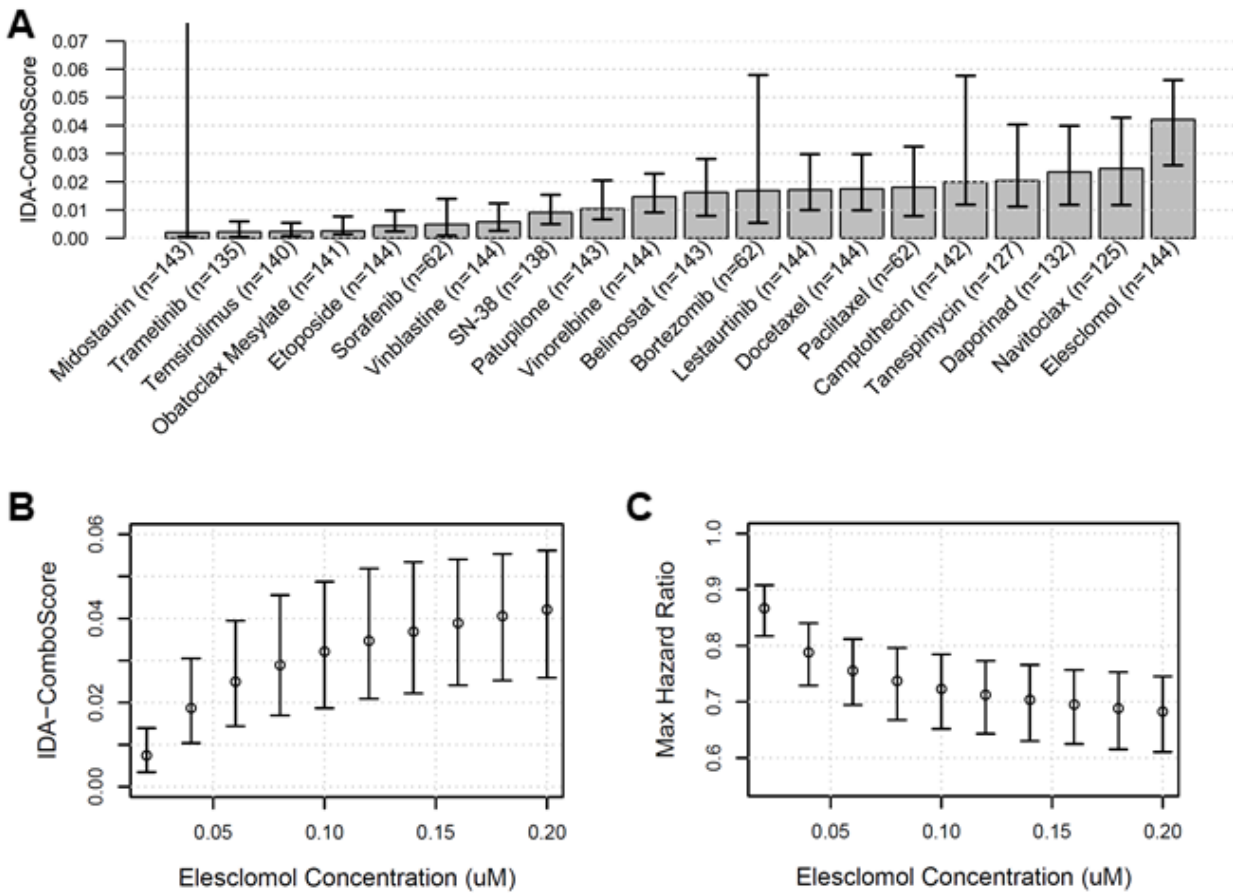

170

171 **Figure S11. IDACombo predicts that elesclomol will efficaciously combine with**

172 **cisplatin+gemcitabine in EGFR WT lung cancer. A)** IDAcomboscores were calculated for the addition  
 173 of late-stage clinical drugs in GDSC at their Csustained concentrations to the control treatment  
 174 combination of Cisplatin (6.44µM) + Gemcitabine (1.14µM) in EGFR WT lung cancer. The number of cell  
 175 lines available to generate predictions for combinations with each additional drug are provided in  
 176 parentheses in the x-axis labels. Only the top 20 IDAcomboscores are plotted here. **B)** Predicted  
 177 IDAcomboscores for the addition of elesclomol to the combination of Cisplatin (6.44µM) + Gemcitabine  
 178 (1.14µM) across a range of concentrations of elesclomol in EGFR WT lung cancer. **C)** Maximum  
 179 predicted hazard ratios for the addition of elesclomol to combination of Cisplatin (6.44µM) + Gemcitabine  
 180 (1.14µM) in EGFR WT lung cancer across a range of concentrations of elesclomol. Maximum hazard ratio  
 181 is defined as the higher hazard ratio (i.e. the hazard ratio that indicates less efficacy improvement from  
 182 the test treatment vs the control treatment) of either: 1. elesclomol+cisplatin+gemcitabine vs  
 183 cisplatin+gemcitabine or 2. elesclomol+cisplatin+gemcitabine vs elesclomol monotherapy. **A-C)** Error  
 184 bars represent mean ± 95% confidence interval as estimated using Monte Carlo Simulations (see Online  
 185 Methods). Source data are provided with this paper.

186

187 **SUPPLEMENTAL TABLES**188 **Table S1. R packages used in the analyses performed in this paper.**

| Package Name   | Package Version | Package Citation             | Package WebLink                                                                                                                                               |
|----------------|-----------------|------------------------------|---------------------------------------------------------------------------------------------------------------------------------------------------------------|
| car            | 2.1.5           | Fox and Weisberg, 2011       | <a href="https://CRAN.R-project.org/package=car">https://CRAN.R-project.org/package=car</a>                                                                   |
| ComplexHeatmap | 1.14.0          | Gu et al., 2016              | <a href="https://bioconductor.org/packages/release/bioc/html/ComplexHeatmap.html">https://bioconductor.org/packages/release/bioc/html/ComplexHeatmap.html</a> |
| drc            | 3.0.1           | Ritz et al., 2015            | <a href="https://CRAN.R-project.org/package=drc">https://CRAN.R-project.org/package=drc</a>                                                                   |
| IDACombo       | 1.0.2           | This paper.                  | <a href="https://github.com/Alexander-Ling/IDACombo">https://github.com/Alexander-Ling/IDACombo</a>                                                           |
| openxlsx       | 4.1.4           | Schauberger and Walker, 2019 | <a href="https://CRAN.R-project.org/package=openxlsx">https://CRAN.R-project.org/package=openxlsx</a>                                                         |
| parallel       | 3.4.2           | R Core Team, 2017            | Created by the R Core team and included in R since R version 2.14.0.                                                                                          |
| pbapply        | 1.3.3           | Solyomos and Zawadzki, 2017  | <a href="https://CRAN.R-project.org/package=pbapply">https://CRAN.R-project.org/package=pbapply</a>                                                           |
| powerSurvEpi   | 0.0.9           | Qiu et al., 2015             | <a href="https://CRAN.R-project.org/package=powerSurvEpi">https://CRAN.R-project.org/package=powerSurvEpi</a>                                                 |
| precrec        | 0.9.1           | Saito and Rehmsmeier, 2017   | <a href="https://CRAN.R-project.org/package=precrec">https://CRAN.R-project.org/package=precrec</a>                                                           |
| progress       | 1.1.2           | Csárdi and FitzJohn, 2016    | <a href="https://CRAN.R-project.org/package=progress">https://CRAN.R-project.org/package=progress</a>                                                         |
| RColorBrewer   | 1.1.2           | Neuwirth, 2014               | <a href="https://CRAN.R-project.org/package=RColorBrewer">https://CRAN.R-project.org/package=RColorBrewer</a>                                                 |
| readr          | 1.1.1           | Wickham et al., 2017         | <a href="https://CRAN.R-project.org/package=readr">https://CRAN.R-project.org/package=readr</a>                                                               |
| readxl         | 1.0.0           | Wickham and Bryan, 2017      | <a href="https://CRAN.R-project.org/package=readxl">https://CRAN.R-project.org/package=readxl</a>                                                             |
| rgl            | 0.98.1          | Adler et al., 2017           | <a href="https://CRAN.R-project.org/package=rgl">https://CRAN.R-project.org/package=rgl</a>                                                                   |
| rvest          | 0.3.2           | Wickham, 2016                | <a href="https://CRAN.R-project.org/package=rvest">https://CRAN.R-project.org/package=rvest</a>                                                               |
| sandwich       | 2.4.0           | Zeileis, 2004, 2006          | <a href="https://CRAN.R-project.org/package=sandwich">https://CRAN.R-project.org/package=sandwich</a>                                                         |
| xlsx           | 0.5.7           | Dragulescu, 2014             | <a href="https://CRAN.R-project.org/package=xlsx">https://CRAN.R-project.org/package=xlsx</a>                                                                 |

## 189 SUPPLEMENTAL RESULTS

### 190 Clinical Trial Validation

#### 191 *Identifying clinical drug concentrations for clinical validation of IDACombo*

192 As mentioned in the main text, we searched published phase I and II clinical trials to  
193 identify clinical plasma concentrations for each drug at the administered doses used in each trial  
194 in our clinical trial validation analysis. Since maximum plasma concentrations (C<sub>max</sub>) are  
195 extremely transient for some drugs, especially those administered via IV bolus, we decided to  
196 use the maximum plasma concentrations achieved at least 6 hours after drug administration (a  
197 metric we termed C<sub>sustained,6hr</sub>) as our concentrations for IDACombo predictions. Figure S4A  
198 illustrates how C<sub>sustained</sub> is calculated for drugs with constantly decreasing plasma  
199 concentrations over time, and Figure S4B illustrates how C<sub>sustained</sub> is calculated for drugs with  
200 increasing plasma concentrations beyond 6 hours. A more detailed description of this metric  
201 and why it was chosen is included in the Online Methods. C<sub>sustained</sub> values for each drug in  
202 the clinical trial analysis, along with the citations used to determine them, are included in  
203 Supplementary Data 4.

#### 204 *Misclassified trials in Figure 4A: PFS/TTP powers in first-line therapy trials*

205 The first false positive in Figure 4A tested the addition of vinorelbine to gemcitabine in  
206 non-small cell lung cancer (NSC lung cancer)<sup>1</sup>. Notably, the National Comprehensive Cancer  
207 Network (NCCN) currently classifies vinorelbine + gemcitabine as a category 1 therapy useful in  
208 certain circumstances for the first-line treatment of advanced NSC lung cancer<sup>2</sup>, indicating that  
209 the predicted utility of this combination may not be entirely inappropriate. Furthermore, this trial  
210 was unusual in our clinical validation dataset in that it only enrolled elderly patients (≥70 years  
211 old), most of whom had multiple comorbidities and non-zero ECOG scores, and death from  
212 unknown causes or losing patients to follow up was considered as progression in this study.

213 The other two false positives in Figure 4A were ovarian cancer trials that tested: 1) the  
214 addition of paclitaxel to carboplatin<sup>3</sup> and 2) the addition of gemcitabine to paclitaxel +  
215 carboplatin<sup>4</sup>. While NCCN guidelines do not recommend paclitaxel + carboplatin + gemcitabine  
216 for ovarian cancer<sup>5</sup>, paclitaxel + carboplatin is considered the backbone of first-line therapy for  
217 ovarian cancer<sup>6</sup>. That said, there is reason to doubt IDACombo's predictions for these  
218 treatments, because dimethyl sulfoxide (DMSO) was used as the solvent for drug testing in  
219 CTRPv2, and DMSO is known to inactivate platinum complexes<sup>7</sup>. Indeed, carboplatin  
220 monotherapy produces an average viability of 97% in CTRPv2 (Supplementary Data 3),  
221 suggesting that the drug may be inactivated in the dataset and, therefore, is not being properly  
222 accounted for in the control therapies for these trials.

223 The false negative in Figure 4A was also an ovarian cancer trial, this time testing the  
224 addition of nintedanib to paclitaxel + carboplatin<sup>8</sup>. Since carboplatin inactivation in this case  
225 would have increased the predicted benefit of nintedanib, it cannot be the cause of this  
226 misclassification. While it is possible that this case represents a case of drug additivity/synergy,  
227 we believe the fact that three out of four misclassified trials are ovarian cancer trials suggests  
228 that the pan-cancer set of cell lines used to generate these predictions may perform poorly  
229 when making predictions for ovarian cancer trials. It is also worth noting that, while this study did  
230 detect a statistically significant improvement in PFS, the study's authors note that the

231 improvement is “of limited clinical relevance” and that the study’s results “do not support a role  
232 for nintedanib in ovarian cancer”<sup>8</sup>.

### 233 *Clinical IDACombo predictions with cancer type/subtype specific sets of cell lines*

234 As mentioned in the main text, we performed analyses to evaluate the suitability of  
235 IDACombo to predict the efficacy of targeted therapies, which are often only effective in specific  
236 molecular subsets of cancer. Two of the clinical trials in our dataset tested targeted therapies  
237 and reported full study results for patients with and without the molecular features targeted by  
238 those therapies. We made power predictions for these two trials using sets of cell lines with or  
239 without the relevant molecular features for each reported patient subgroup. The resulting  
240 predictions for these trials are shown in Supplementary Data 5. Notably, IDACombo’s  
241 predictions agreed with clinical findings that there is a higher expected benefit for patients with  
242 the molecular features targeted by the targeted therapies than for patients without those  
243 molecular features. However, the subtype-specific predictions did not reach the 80% power  
244 cutoff necessary to correctly classify the trials. This may be due to the fact that very few cell  
245 lines were available for these subtype-specific predictions, leading to relatively high prediction  
246 uncertainties and a relatively small population in which to detect phenotypic heterogeneity.

247 To further assess the utility of making predictions with sets of cell lines matched to  
248 patient phenotypes, we predicted clinical trial powers using cancer-specific sets of cell lines for  
249 each clinical trial (Figure S6). Note that clinical trials were excluded if fewer than 5 cancer-  
250 specific cell lines were available with which to make predictions. The cancer-specific predictions  
251 resulted in accuracies > 80% for trials in chemo-naïve patients, but model performance was  
252 generally reduced and prediction uncertainties increased for cancer-specific predictions versus  
253 pan-cancer predictions. This result, along with the analysis of the two targeted therapy trials,  
254 suggests that predictions made using cancer and subtype-specific sets of cell lines could be  
255 preferable to pan-cancer predictions if sufficient numbers of cell lines were available for each  
256 cancer type, but there are currently too few cell lines available for each cancer type in these  
257 datasets for this approach to be viable. In the meantime, pan-cancer predictions appear to be  
258 adequate for most of the drug combinations used in our clinical trial dataset.

### 259 *Clinical IDACombo predictions are affected by selected drug concentrations, but remain 260 accurate, sensitive, and specific across a range of concentrations*

261 Beyond the selection of cell lines, we also wanted to investigate the importance of drug  
262 concentration selection for IDACombo predictions. We examined the importance of drug  
263 concentration selection by assessing whether or not prediction performance was harmed by  
264 using drug concentrations that deviated from clinical plasma concentrations. When predictions  
265 were made using the maximum concentrations tested for each drug in either CTRPv2 or GDSC  
266 rather than Csustained concentrations, prediction accuracies in treatment-naïve trials fell  
267 dramatically (65.4% accuracy for PFS/TTP and 71.4% accuracy for OS) (Figures S7A and  
268 S7B). Alternatively, when the Csustained concentrations for each drug in a trial were multiplied  
269 by factors between 0.1 and 10, we found that uniformly increasing drug concentrations kept the  
270 method’s sensitivity high but decreased accuracy, specificity, and precision for both PFS/TTP  
271 and OS. Uniformly decreasing concentrations quickly reduced sensitivity and precision (Figures  
272 S7C and S7D). These results suggest that correctly identifying clinical drug concentrations is  
273 important for *in vitro* predictions using IDA, with underestimated concentrations decreasing

274 model performance more than overestimated concentrations when clinical dose ratios between  
275 drugs are preserved.

276 *Clinical IDACombo prediction accuracy drops when predicting efficacy for trials with drugs which*  
277 *have plasma concentrations beyond the tested in vitro concentrations*

278 To further assess the importance of drug concentration for model performance, we  
279 looked at trials that used treatments which resulted in Csustained concentrations greater than  
280 the concentrations tested for those drugs *in vitro*. Several of the trials identified from  
281 ClinicalTrials.gov tested drugs with Csustained concentrations above the tested concentrations  
282 for those drugs in CTRPv2 or GDSC, with several trials including drugs with Csustained  
283 concentrations > 2x the tested *in vitro* concentrations in GDSC (Figures S8A and S8C). To  
284 determine whether or not this would affect IDACombo based power predictions for these trials,  
285 we calculated model performance for both PFS/TTP and OS for these trials (specifically trials in  
286 chemo-naïve patients) and compared model performance to whether or not trials included drugs  
287 with Csustained concentrations higher than tested *in vitro* concentrations. Trials with at least  
288 one drug with a Csustained concentration > 2x the maximum tested *in vitro* concentration for  
289 that drug showed largely reduced accuracy, specificity, and precision in both PFS/TTP and OS  
290 predictions relative to trials with drugs that have Csustained concentrations ≤2x the maximum  
291 tested *in vitro* concentrations (Figures S8B and S8D). As a result of this finding, only trials with  
292 drugs that have Csustained concentrations ≤2x the maximum tested *in vitro* concentrations  
293 were included in the clinical analyses in this paper.

## 294 **Prospective Analysis**

### 295 *IDAcomboscore Clusters*

296 As mentioned in the main text, the clusters in Figure 5 can partially be explained by drug  
297 mechanisms of action, as drugs with the same mechanism of action often end up in the same  
298 hierarchical clusters (at least, this is the case for the few mechanisms of action for which we  
299 have more than one drug). This does not fully explain the clustering, however, as we can see  
300 with topoisomerase inhibitors and EGFR inhibitors, which are divided between several small  
301 clusters. A more detailed analysis of the drugs' mechanisms of action may partially explain this,  
302 as, for the topoisomerase inhibitors, drugs are separated by whether or not they inhibit  
303 topoisomerase I or II and whether or not they act by binding DNA or intercalating DNA. This is  
304 highly speculative, however, given the small number of drugs available for each mechanism of  
305 action. It is also notable that drugs which have similar average viabilities across all cell lines  
306 when used as a monotherapy tend to be more closely clustered. This suggests that the  
307 clustering observed in Figure 5 may be explained partially by similarity in drug mechanisms and  
308 partially by similarity in the average monotherapy efficacies of drugs at their clinical  
309 concentrations. Unfortunately, a more detailed analysis of which mechanisms and monotherapy  
310 efficacies provide the most effective combinations is prevented by the limited number of drugs  
311 available for each drug mechanism.

312 *The accuracy of cancer-specific IDACombo predictions is currently limited by the number of*  
313 *available cell lines for each cancer type*

314 As discussed in the main text, we sought to determine how many cell lines are  
315 necessary to create accurate predictions using IDACombo. Since the true efficacy of most drug  
316 combinations is not known, we decided to use agreement between predictions made using

317 CTRPv2 and GDSC as a metric of prediction accuracy. Notably, we only compared CTRPv2  
318 and GDSC predictions for combinations in which Csustained was available for both drugs in  
319 both datasets and which had at least 400 cell lines available to make predictions with—this  
320 resulted in comparisons for 351 drug combinations involving 27 compounds.

321 For the comparison, we calculated Spearman's  $\rho$  between CTRPv2 and GDSC  
322 predictions made with varying number of cell lines and plotted them in Figure S10A. This  
323 revealed that a  $\rho$  as high as 0.8 could be achieved using 250 or more cell lines, and that this  
324 correlation slowly decreased to  $\sim 0.7$  as the number of cell lines was reduced to 50. With less  
325 than 50 cell lines,  $\rho$  decreased more rapidly, to  $\sim 0.6$  with 25 cell lines and  $\sim 0.3$  with 5 cell lines.  
326 This suggests that most cancer-specific predictions will be suboptimal, owing to their having  
327 less than 50 cell lines available to make predictions with, but it also suggests that there is some  
328 level of reproducibility using those numbers of cell lines. To quantify this reproducibility  
329 specifically for the cancer types available in CTRPv2 and GDSC, we plotted Spearman  $\rho$ 's  
330 between cancer-specific IDAcomboscores versus the median number of cell lines available for  
331 each of 27 cancer types/subtypes (Figure S10B). The results largely agreed with the  
332 downsampling approach in Figure S10A, showing that Spearman  $\rho$ 's for cancer-specific  
333 predictions ranged from  $\sim 0.7$  to  $\sim 0.3$  depending roughly on how many cell lines were available  
334 for each cancer type. A full list of correlation coefficients for each cancer type can be found in  
335 Data S6. These findings suggest that highly reproducible cancer-specific predictions are  
336 currently possible for some cancer types, but IDACombo predictions for most cancer types  
337 would likely be significantly improved by increasing the number of cell lines available for those  
338 cancer types.

### 339 **SUPPLEMENTAL DISCUSSION**

340 As briefly mentioned in the main text, there are several limitations of our method that  
341 must be considered when using it in the future.

342 First, while IDACombo's predicted efficacies strongly correlate with measured efficacies  
343 in NCI-ALMANAC and deviations of predicted efficacies from measured efficacies are generally  
344 small, it is still obvious that examples can be found where the measured effect of a drug  
345 combination is significantly different from the predicted effect. These may represent true cases  
346 of drug synergy, additivity, or antagonism, and the drug interactions present in these  
347 combinations could have a significant impact on the clinical behavior of these treatments. Given  
348 this result and the fact that synergistic drug combinations are likely to outperform combinations  
349 that work via IDA<sup>9</sup>, it is likely that predictions based on IDA will fail to identify a subset of highly  
350 effective drug combinations. Synergy and additivity based prediction methods will need to be  
351 developed to identify such combinations. Fortunately, however, the results of our clinical trial  
352 validation analysis suggest that this is not a problem for most clinical drug combinations, as the  
353 large majority of them were predicted well using IDACombo, at least for trials in previously  
354 untreated patients.

355 This brings us to a second, and perhaps more serious, limitation of the method, which is  
356 an apparent unsuitability of cell-line based IDA predictions for patients who have undergone  
357 previous cancer drug treatment. We do not have sufficient data from our analyses to definitively  
358 explain this finding, but we can propose several hypotheses for future testing. First, there is the  
359 possibility that the difference in model performance between previously treated and previously  
360 untreated patients is coincidental—merely due to the model working better for some drugs than



361 for others and to different drugs being tested in trials of previously treated or untreated patients.  
362 Upon a closer inspection of the drugs involved in misclassified trials, however, we believe this is  
363 unlikely to be the case. Of the 12 drugs involved in trials that were misclassified for PFS/TTP  
364 improvement, all except vandetanib and nintedanib (which were both used in only a single trial)  
365 were also used in trials that were correctly classified, and 8 of the 12 drugs were used in  
366 correctly classified trials at least as often as they were used in misclassified trials. A more likely  
367 explanation for this finding could be that the cell line models in CTRPv2 and GDSC may more  
368 accurately represent chemo-naïve tumors than previously treated tumors. It is well known that  
369 drug treatment can induce clonal selection in tumors in ways that alter the tumors' drug  
370 sensitivities<sup>10</sup>. While these altered sensitivities may be reflected in cell lines that were generated  
371 from the tumors of previously treated patients<sup>11</sup>, it is likely that the cell lines in CTRPv2 and  
372 GDSC were derived under a diverse set of circumstances. As such, we would not expect our  
373 population of available cell lines to be a good representation of a population of tumors which  
374 had all recently received similar drug treatments. In the future, it may be possible to test this  
375 hypothesis by creating panels of cell lines that are derived from patients who had received the  
376 same prior therapies as the patients in the trials which were poorly predicted in this study and  
377 then test whether predictions made with these cell line panels agree with the clinical findings of  
378 those trials.

379 A third limitation of this study is that our method is currently unable to make predictions  
380 for combinations which include immunotherapies or drugs which function by acting systemically  
381 on non-tumor cells, such as drugs that act systemically to block hormone synthesis. This is  
382 because our predictions rely on *in vitro* drug screening data, and the *in vitro* systems that have  
383 been used for high-throughput cancer cell line drug screens lack the ability to mimic immune  
384 responses or non-tumor processes such as systemic hormone production. This does not mean,  
385 however, that IDA based predictions of drug combination efficacy are unsuitable for  
386 immunotherapies or drugs which act outside of the tumor. Efforts are underway to generate *in*  
387 *vitro* models which may be suitable for screening immunotherapies in the future<sup>12</sup> and which  
388 could allow for IDA based predictions to be made for immunotherapy combinations. While those  
389 models mature, however, IDA based predictions of efficacy for combinations with  
390 immunotherapies/systemically acting therapies may be made using the results of monotherapy  
391 based clinical trials and the method developed by Palmer and Sorger<sup>9</sup>, providing that cross-  
392 resistance can be estimated between combined treatments.

393 Despite these limitations, our results are notable for several reasons which are briefly  
394 discussed in the main text. A more detailed discussion of these reasons is as follows.

395 First, these results demonstrate that *in vitro* drug screening data can be used to  
396 generate clinically meaningful predictions for drug combination efficacies in patients, and,  
397 furthermore, they suggest that many of these predictions can be made using pan-cancer sets of  
398 cell lines. This is somewhat unexpected given the wide range of genetic and phenotypic  
399 diversities observed between different cancer types. On the other hand, our results suggest that  
400 it will be necessary to make predictions using cell lines of the appropriate cancer type/subtype  
401 for targeted therapies, and we believe it is likely that cancer-specific IDACombo predictions  
402 could be comparable to or better than pan-cancer predictions if not for the fact that many cancer  
403 types currently have relatively few available cell lines in CTRPv2 and GDSC. The solution to this  
404 problem, however, may be more complicated than simply increasing the number of cell lines for  
405 each cancer type. That is because it must also be noted that, beyond the limited numbers of cell

406 lines available for many cancer types, the ethnic diversity of available cancer cell lines is also  
407 very limited—particularly for ethnicities other than Caucasian or Asian <sup>13</sup>. This means that  
408 caution will be necessary when applying the predictions made in this paper to ethnicities that  
409 are poorly represented in the cell lines currently available in CTRPv2 and GDSC. Fortunately,  
410 others in the field have already recognized the need to increase the number and genetic  
411 diversity of available cancer cell lines <sup>14</sup>, and the Broad Institute has received an NCI contract to  
412 create new cancer cell lines (<https://portals.broadinstitute.org/cellfactory>). This has already lead  
413 to the creation of over 100 validated cancer models. The use of these models in future  
414 monotherapy drug screens may improve predictions made with IDACombo even further.

415 A second reason that the success of IDACombo is notable is that, despite our extensive  
416 efforts to identify clinical relevant drug concentrations for each drug in our analysis, these  
417 concentrations remain only rough estimates of true clinically relevant concentrations. Beyond  
418 the fact that measured plasma concentrations are simply unavailable for some drugs and doses  
419 for patients of each cancer type, there is little available information about how plasma drug  
420 concentrations relate to intratumoral drug concentrations *in vivo*. Similarly, there is little  
421 available information about how media drug concentrations relate to intracellular drug  
422 concentrations *in vitro*. In the single study we were able to find that did examine these  
423 relationships, researchers found that the clinically relevant *in vitro* drug concentration for  
424 paclitaxel may be an order of magnitude below clinically measured plasma concentrations <sup>15</sup>.  
425 Even with this information, the appropriate paclitaxel concentration to use for different cancer  
426 types is unclear, because the concentrations identified in the study were based on only two cell  
427 lines and six patients in a single cancer type. Given that our results suggest that varying drug  
428 concentrations can significantly affect prediction performance, it is possible that IDACombo  
429 predictions could be improved by future research aimed at identifying the *in vitro* drug  
430 concentrations that most closely mimic the drug exposure of tumor cells in the clinic. It is  
431 notable, however, that IDACombo works as well as it does—especially given the high  
432 uncertainties in the drug concentrations we used to estimate clinical trial powers. It is our hope  
433 that this method will help researchers identify promising combinations for future clinical  
434 development and that they will ultimately lead to improved therapies for cancer patients.

435

436 **SUPPLEMENTAL REFERENCES**

437 **(Note that this section includes references from the supplemental tables)**

- 438 1. Gridelli, C. *et al.* Chemotherapy for Elderly Patients With Advanced Non-Small-Cell Lung  
439 Cancer: The Multicenter Italian Lung Cancer in the Elderly Study (MILES) Phase III  
440 Randomized Trial. *JNCI J. Natl. Cancer Inst.* **95**, 362–372 (2003).
- 441 2. National Comprehensive Cancer Network. NCCN Clinical Practice Guidelines in Oncology  
442 – Non-Small Cell Lung Cancer. V3.2020. (2020).
- 443 3. The ICON Group. Paclitaxel plus carboplatin versus standard chemotherapy with either  
444 single-agent carboplatin or cyclophosphamide, doxorubicin, and cisplatin in women with  
445 ovarian cancer: the ICON3 randomised trial. *Lancet Lond. Engl.* **360**, 505–515 (2002).
- 446 4. Bois, A. du *et al.* Phase III Trial of Carboplatin Plus Paclitaxel With or Without Gemcitabine  
447 in First-Line Treatment of Epithelial Ovarian Cancer. *J. Clin. Oncol.* (2010)  
448 doi:10.1200/JCO.2009.27.4696.
- 449 5. National Comprehensive Cancer Network. NCCN Clinical Practice Guidelines in Oncology  
450 – Ovarian Cancer Including Fallopian Tube Cancer and Primary Peritoneal Cancer.  
451 V3.2019. (2019).
- 452 6. Boyd, L. R. & Muggia, F. M. Carboplatin/Paclitaxel Induction in Ovarian Cancer: The Finer  
453 Points. *Oncol. Williston Park N* **32**, 418–420, 422–424 (2018).
- 454 7. Hall, M. D. *et al.* Say No to DMSO: Dimethylsulfoxide Inactivates Cisplatin, Carboplatin and  
455 Other Platinum Complexes. *Cancer Res.* **74**, 3913–3922 (2014).
- 456 8. Ray-Coquard, I. *et al.* Final results from GCIG/ENGOT/AGO-OVAR 12, a randomised  
457 placebo-controlled phase III trial of nintedanib combined with chemotherapy for newly  
458 diagnosed advanced ovarian cancer. *Int. J. Cancer* **146**, 439–448 (2020).
- 459 9. Palmer, A. C. & Sorger, P. K. Combination Cancer Therapy Can Confer Benefit via  
460 Patient-to-Patient Variability without Drug Additivity or Synergy. *Cell* **171**, 1678-1691.e13  
461 (2017).
- 462 10. Ibragimova, M. K., Tsyganov, M. M. & Litviakov, N. V. Natural and chemotherapy-induced  
463 clonal evolution of tumors. *Biochem. Mosc.* **82**, 413–425 (2017).
- 464 11. Berendsen, H. H. *et al.* Characterization of Three Small Cell Lung Cancer Cell Lines  
465 Established from One Patient during Longitudinal Follow-up. *Cancer Res.* **48**, 6891–6899  
466 (1988).
- 467 12. Dijkstra, K. K. *et al.* Generation of Tumor-Reactive T Cells by Co-culture of Peripheral  
468 Blood Lymphocytes and Tumor Organoids. *Cell* **174**, 1586-1598.e12 (2018).

- 469 13. Ling, A., Gruener, R. F., Fessler, J. & Huang, R. S. More than fishing for a cure: The  
470 promises and pitfalls of high throughput cancer cell line screens. *Pharmacol. Ther.* **191**,  
471 178–189 (2018).
- 472 14. Boehm, J. S. & Golub, T. R. An ecosystem of cancer cell line factories to support a cancer  
473 dependency map. *Nat. Rev. Genet.* **16**, 373–374 (2015).
- 474 15. Zasadil, L. M. *et al.* Cytotoxicity of paclitaxel in breast cancer is due to chromosome  
475 missegregation on multipolar spindles. *Sci. Transl. Med.* **6**, 229ra43 (2014).
- 476 16. Aoki, D. *et al.* A phase II clinical trial of topotecan in Japanese patients with relapsed  
477 ovarian carcinoma. *Jpn. J. Clin. Oncol.* **41**, 320–327 (2011).
- 478 17. Baker, S. D. *et al.* Comparative Pharmacokinetics of Weekly and Every-Three-Weeks  
479 Docetaxel. *Clin. Cancer Res.* **10**, 1976–1983 (2004).
- 480 18. Bocci, G. *et al.* Comparative pharmacokinetic analysis of 5-fluorouracil and its major  
481 metabolite 5-fluoro-5,6-dihydrouracil after conventional and reduced test dose in cancer  
482 patients. *Clin. Cancer Res. Off. J. Am. Assoc. Cancer Res.* **6**, 3032–3037 (2000).
- 483 19. Bonnetterre, J., Chevalier, B., Focan, C., Mauriac, L. & Piccart, M. Phase I and  
484 pharmacokinetic study of weekly oral therapy with vinorelbine in patients with advanced  
485 breast cancer (ABC). *Ann. Oncol. Off. J. Eur. Soc. Med. Oncol.* **12**, 1683–1691 (2001).
- 486 20. Brooks, D. J. *et al.* Phase I and pharmacokinetic study of etoposide phosphate. *Anticancer.*  
487 *Drugs* **6**, 637–644 (1995).
- 488 21. Burz, C. *et al.* Clinical and pharmacokinetics study of oxaliplatin in colon cancer patients. *J.*  
489 *Gastrointest. Liver Dis. JGLD* **18**, 39–43 (2009).
- 490 22. Chabot, G. G. *et al.* Population pharmacokinetics and pharmacodynamics of irinotecan  
491 (CPT-11) and active metabolite SN-38 during phase I trials. *Ann. Oncol.* **6**, 141–151  
492 (1995).
- 493 23. Chen, T.-L. *et al.* Nonlinear Pharmacokinetics of Cyclophosphamide in Patients with  
494 Metastatic Breast Cancer Receiving High-Dose Chemotherapy followed by Autologous  
495 Bone Marrow Transplantation. *Cancer Res.* **55**, 810–816 (1995).
- 496 24. Comandone, A. *et al.* High dose methotrexate in adult patients with osteosarcoma: clinical  
497 and pharmacokinetic results. *Acta Oncol. Stockh. Swed.* **44**, 406–411 (2005).
- 498 25. Danhauser, L. L. *et al.* Phase I and plasma pharmacokinetic study of infusional fluorouracil  
499 combined with recombinant interferon alfa-2b in patients with advanced cancer. *J. Clin.*  
500 *Oncol.* **11**, 751–761 (1993).

- 501 26. Diamant, Z., Samuelsson Palmgren, G., Westrin, B. & Bjermer, L. Phase I study evaluating  
502 the safety, tolerability and pharmacokinetics of a novel oral dissolvable film containing  
503 dexamethasone versus Fortecortin dexamethasone tablets. *Eur. Clin. Respir. J.* **4**, (2017).
- 504 27. Doebele, R. C. *et al.* A phase I, open-label dose-escalation study of continuous treatment  
505 with BIBF 1120 in combination with paclitaxel and carboplatin as first-line treatment in  
506 patients with advanced non-small-cell lung cancer. *Ann. Oncol.* **23**, 2094–2102 (2012).
- 507 28. Doi, T. *et al.* Phase 1 pharmacokinetic study of the oral pan-AKT inhibitor MK-2206 in  
508 Japanese patients with advanced solid tumors. *Cancer Chemother. Pharmacol.* **76**, 409–  
509 416 (2015).
- 510 29. Fakih, M. G. *et al.* A phase I, pharmacokinetic, and pharmacodynamic study of two  
511 schedules of vorinostat in combination with 5-fluorouracil and leucovorin in patients with  
512 refractory solid tumors. *Clin. Cancer Res. Off. J. Am. Assoc. Cancer Res.* **16**, 3786–3794  
513 (2010).
- 514 30. Fraile, R. J., Baker, L. H., Buroker, T. R., Horwitz, J. & Vaitkevicius, V. K.  
515 Pharmacokinetics of 5-Fluorouracil Administered Orally, by Rapid Intravenous and by Slow  
516 Infusion. *Cancer Res.* **40**, 2223–2228 (1980).
- 517 31. Fujisaka, Y. *et al.* Phase 1 clinical study of pegylated liposomal doxorubicin (JNS002) in  
518 Japanese patients with solid tumors. *Jpn. J. Clin. Oncol.* **36**, 768–774 (2006).
- 519 32. Fumoleau, P. *et al.* A phase I pharmacokinetics study of lapatinib and tamoxifen in  
520 metastatic breast cancer (EORTC 10053 Lapatam study). *The Breast* **23**, 663–669 (2014).
- 521 33. Grahnén, A., von Bahr, C., Lindström, B. & Rosén, A. Bioavailability and pharmacokinetics  
522 of cimetidine. *Eur. J. Clin. Pharmacol.* **16**, 335–340 (1979).
- 523 34. Greene, R. F., Collins, J. M., Jenkins, J. F., Speyer, J. L. & Myers, C. E. Plasma  
524 Pharmacokinetics of Adriamycin and Adriamycinol: Implications for the Design of in Vitro  
525 Experiments and Treatment Protocols. *Cancer Res.* **43**, 3417–3421 (1983).
- 526 35. Hageboutros, A. *et al.* Phase I study of phosphonacetyl-L-aspartate, 5-fluorouracil, and  
527 leucovorin in patients with advanced cancer. *Cancer Chemother. Pharmacol.* **35**, 205–212  
528 (1995).
- 529 36. Hartigh, J. den, McVie, J. G., Oort, W. J. V. & Pinedo, H. M. Pharmacokinetics of  
530 Mitomycin C in Humans. *Cancer Res.* **43**, 5017–5021 (1983).
- 531 37. Hidalgo, M. *et al.* Phase I and Pharmacologic Study of OSI-774, an Epidermal Growth  
532 Factor Receptor Tyrosine Kinase Inhibitor, in Patients With Advanced Solid Malignancies.  
533 *J. Clin. Oncol.* **19**, 3267–3279 (2001).

- 534 38. Huang, S.-Y. *et al.* Pharmacokinetic study of bortezomib administered intravenously in  
535 Taiwanese patients with multiple myeloma. *Hematol. Oncol.* **36**, 238–244 (2018).
- 536 39. Ibrahim, N. K. *et al.* Phase I and Pharmacokinetic Study of ABI-007, a Cremophor-free,  
537 Protein-stabilized, Nanoparticle Formulation of Paclitaxel. *Clin. Cancer Res.* **8**, 1038–1044  
538 (2002).
- 539 40. Ikeda, K. *et al.* Pharmacokinetics of Cisplatin in Combined Cisplatin and 5-Fluorouracil  
540 Therapy: A Comparative Study of Three Different Schedules of Cisplatin Administration.  
541 *Jpn. J. Clin. Oncol.* **28**, 168–175 (1998).
- 542 41. Inoue, K. *et al.* Safety, pharmacokinetics and efficacy findings in an open-label, single-arm  
543 study of weekly paclitaxel plus lapatinib as first-line therapy for Japanese women with  
544 HER2-positive metastatic breast cancer. *Int. J. Clin. Oncol.* **20**, 1102–1109 (2015).
- 545 42. Jain, L. *et al.* Population pharmacokinetic analysis of sorafenib in patients with solid  
546 tumours. *Br. J. Clin. Pharmacol.* **72**, 294–305 (2011).
- 547 43. Kerbusch, T. *et al.* Influence of Dose and Infusion Duration on Pharmacokinetics of  
548 Ifosfamide and Metabolites. *Drug Metab. Dispos.* **29**, 967–975 (2001).
- 549 44. Keyvanjah, K. *et al.* Pharmacokinetics of neratinib during coadministration with  
550 lansoprazole in healthy subjects. *Br. J. Clin. Pharmacol.* **83**, 554–561 (2017).
- 551 45. Kurata, T. *et al.* Phase I and Pharmacological Study of Paclitaxel Given Over 3 h with  
552 Cisplatin for Advanced Non-small Cell Lung Cancer. *Jpn. J. Clin. Oncol.* **31**, 93–99 (2001).
- 553 46. Lankheet, N. A. G. *et al.* Pharmacokinetically guided sunitinib dosing: a feasibility study in  
554 patients with advanced solid tumours. *Br. J. Cancer* **110**, 2441–2449 (2014).
- 555 47. Levêque, D., Jehl, F., Quoix, E. & Breillout, F. Clinical Pharmacokinetics of Vinorelbine  
556 Alone and Combined with Cisplatin. *J. Clin. Pharmacol.* **32**, 1096–1098 (1992).
- 557 48. Liston, D. R. & Davis, M. Clinically Relevant Concentrations of Anticancer Drugs: A Guide  
558 for Nonclinical Studies. *Clin. Cancer Res.* **23**, 3489–3498 (2017).
- 559 49. Ma, W. W. *et al.* Phase I Study of Rigosertib, an Inhibitor of the Phosphatidylinositol 3-  
560 Kinase and Polo-like Kinase 1 Pathways, Combined with Gemcitabine in Patients with  
561 Solid Tumors and Pancreatic Cancer. *Clin. Cancer Res.* **18**, 2048–2055 (2012).
- 562 50. Mavroudis, D. *et al.* A dose-escalation and pharmacokinetic study of gemcitabine and  
563 oxaliplatin in patients with advanced solid tumors. *Ann. Oncol. Off. J. Eur. Soc. Med.*  
564 *Oncol.* **14**, 304–312 (2003).

- 565 51. Mehrotra, S. *et al.* Population pharmacokinetics and site of action exposures of veliparib  
566 with topotecan plus carboplatin in patients with haematological malignancies. *Br. J. Clin.*  
567 *Pharmacol.* **83**, 1688–1700 (2017).
- 568 52. Moloney, M. *et al.* Feasibility of 5-fluorouracil pharmacokinetic monitoring using the My-  
569 5FU PCM™ system in a quaternary oncology centre. *Cancer Chemother. Pharmacol.* **82**,  
570 865–876 (2018).
- 571 53. Müller, M. *et al.* Interstitial methotrexate kinetics in primary breast cancer lesions. *Cancer*  
572 *Res.* **58**, 2982–2985 (1998).
- 573 54. Nokihara, H., Yamamoto, N., Ohe, Y., Hiraoka, M. & Tamura, T. Pharmacokinetics of  
574 Weekly Paclitaxel and Feasibility of Dexamethasone Taper in Japanese Patients with  
575 Advanced Non-small Cell Lung Cancer. *Clin. Ther.* **38**, 338–347 (2016).
- 576 55. Rajkumar, P. *et al.* Cisplatin Concentrations in Long and Short Duration Infusion:  
577 Implications for the Optimal Time of Radiation Delivery. *J. Clin. Diagn. Res.* **10**, XC01–  
578 XC04 (2016).
- 579 56. Reigner, B., Blesch, K. & Weidekamm, E. Clinical Pharmacokinetics of Capecitabine. *Clin.*  
580 *Pharmacokinet.* **40**, 85–104 (2001).
- 581 57. Rugo, H. S. *et al.* Phase I Trial of the Oral Antiangiogenesis Agent AG-013736 in Patients  
582 With Advanced Solid Tumors: Pharmacokinetic and Clinical Results. *J. Clin. Oncol.* **23**,  
583 5474–5483 (2005).
- 584 58. Shiah, H.-S. *et al.* Phase I and pharmacokinetic study of oral thalidomide in patients with  
585 advanced hepatocellular carcinoma. *Cancer Chemother. Pharmacol.* **58**, 654–664 (2006).
- 586 59. Shirao, K. *et al.* Phase I Study of Single-Dose Oxaliplatin in Japanese Patients with  
587 Malignant Tumors. *Jpn. J. Clin. Oncol.* **36**, 295–300 (2006).
- 588 60. Speth, P. A. J., Linssen, P. C. M., Holdrinet, R. S. G. & Haanen, C. Plasma and cellular  
589 Adriamycin concentrations in patients with myeloma treated with ninety-six-hour  
590 continuous infusion. *Clin. Pharmacol. Ther.* **41**, 661–665 (1987).
- 591 61. Speyer, J. L. *et al.* Prospective evaluation of cardiotoxicity during a six-hour doxorubicin  
592 infusion regimen in women with adenocarcinoma of the breast. *Am. J. Med.* **78**, 555–563  
593 (1985).
- 594 62. Tchekmedyan, N. S. *et al.* Phase I clinical and pharmacokinetic study of  
595 cyclophosphamide administered by five-day continuous intravenous infusion. *Cancer*  
596 *Chemother. Pharmacol.* **18**, 33–38 (1986).

- 597 63. Terret, C. *et al.* Dose and time dependencies of 5-fluorouracil pharmacokinetics. *Clin.*  
598 *Pharmacol. Ther.* **68**, 270–279 (2000).
- 599 64. Van Veggel, M., Westerman, E. & Hamberg, P. Clinical Pharmacokinetics and  
600 Pharmacodynamics of Panobinostat. *Clin. Pharmacokinet.* **57**, 21–29 (2018).
- 601 65. Wada, T. *et al.* Pharmacokinetic analyses of carboplatin in a patient with cancer of the  
602 fallopian tubes undergoing hemodialysis: A case report. *Biomed. Rep.* **5**, 199–202 (2016).
- 603 66. Wang, X. *et al.* Differential effects of dosing regimen on the safety and efficacy of  
604 dasatinib: retrospective exposure–response analysis of a Phase III study. *Clin. Pharmacol.*  
605 *Adv. Appl.* **5**, 85–97 (2013).
- 606 67. Xue, C. *et al.* Randomized, Multicenter Study of Gefitinib Dose-escalation in Advanced  
607 Non-small-cell Lung Cancer Patients Achieved Stable Disease after One-month Gefitinib  
608 Treatment. *Sci. Rep.* **5**, 10648 (2015).
- 609 68. Yamamoto, N. *et al.* A Phase I, dose-finding and pharmacokinetic study of olaparib  
610 (AZD2281) in Japanese patients with advanced solid tumors. *Cancer Sci.* **103**, 504–509  
611 (2012).
- 612 69. Yamamoto, N. *et al.* CYP2C19 genotype-based phase I studies of a c-Met inhibitor  
613 tivantinib in combination with erlotinib, in advanced/metastatic non-small cell lung cancer.  
614 *Br. J. Cancer* **109**, 2803–2809 (2013).
- 615 70. Yamazaki, N. *et al.* Phase 1/2 study assessing the safety and efficacy of dabrafenib and  
616 trametinib combination therapy in Japanese patients with BRAF V600 mutation-positive  
617 advanced cutaneous melanoma. *J. Dermatol.* **45**, 397–407 (2018).
- 618 71. Yen, C.-J. *et al.* A Phase I/Randomized Phase II Study to Evaluate the Safety,  
619 Pharmacokinetics, and Efficacy of Nintedanib versus Sorafenib in Asian Patients with  
620 Advanced Hepatocellular Carcinoma. *Liver Cancer* **7**, 165–178 (2018).
- 621 72. Zhang, L. *et al.* Pharmacokinetics and Tolerability of Vandetanib in Chinese Patients With  
622 Solid, Malignant Tumors: An Open-Label, Phase I, Rising Multiple-Dose Study. *Clin. Ther.*  
623 **33**, 315–327 (2011).
- 624 73. Abbas, R. *et al.* A phase I ascending single-dose study of the safety, tolerability, and  
625 pharmacokinetics of bosutinib (SKI-606) in healthy adult subjects. *Cancer Chemother.*  
626 *Pharmacol.* **69**, 221–227 (2012).
- 627 74. Amaravadi, R. K. *et al.* A Phase 1 Study of the SMAC-Mimetic Birinapant in Adults with  
628 Refractory Solid Tumors or Lymphoma. *Mol. Cancer Ther.* **14**, 2569–2575 (2015).



- 629 75. Attard, G. *et al.* Phase I Clinical Trial of a Selective Inhibitor of CYP17, Abiraterone  
630 Acetate, Confirms That Castration-Resistant Prostate Cancer Commonly Remains  
631 Hormone Driven. *J. Clin. Oncol.* **26**, 4563–4571 (2008).
- 632 76. Balis, F. M. *et al.* First-dose and steady-state pharmacokinetics of orally administered  
633 crizotinib in children with solid tumors: a report on ADVL0912 from the Children’s Oncology  
634 Group Phase 1/Pilot Consortium. *Cancer Chemother. Pharmacol.* **79**, 181–187 (2017).
- 635 77. Berkenblit, A. *et al.* Phase I Clinical Trial of STA-4783 in Combination with Paclitaxel in  
636 Patients with Refractory Solid Tumors. *Clin. Cancer Res.* **13**, 584–590 (2007).
- 637 78. Breithaupt, H., Dammann, A. & Aigner, K. Pharmacokinetics of dacarbazine (DTIC) and its  
638 metabolite 5-aminoimidazole-4-carboxamide (AIC) following different dose schedules.  
639 *Cancer Chemother. Pharmacol.* **9**, 103–109 (1982).
- 640 79. Cantarovich, F. *et al.* Cyclosporine plasma levels six hours after oral administration. A  
641 useful tool for monitoring therapy. *Transplantation* **45**, 389–394 (1988).
- 642 80. Cheng, A. L. *et al.* Phase I clinical trial of curcumin, a chemopreventive agent, in patients  
643 with high-risk or pre-malignant lesions. *Anticancer Res.* **21**, 2895–2900 (2001).
- 644 81. Dahut, W. L. *et al.* A Phase I Study of Oral Lenalidomide in Patients with Refractory  
645 Metastatic Cancer. *J. Clin. Pharmacol.* **49**, 650–660 (2009).
- 646 82. Davids, M. S. *et al.* Phase I First-in-Human Study of Venetoclax in Patients With Relapsed  
647 or Refractory Non-Hodgkin Lymphoma. *J. Clin. Oncol.* **35**, 826–833 (2017).
- 648 83. European Medicines Agency. Assessment report: Alsitek.  
649 [https://www.ema.europa.eu/en/documents/assessment-report/alsitek-epar-refusal-public-](https://www.ema.europa.eu/en/documents/assessment-report/alsitek-epar-refusal-public-assessment-report_en.pdf)  
650 [assessment-report\\_en.pdf](https://www.ema.europa.eu/en/documents/assessment-report/alsitek-epar-refusal-public-assessment-report_en.pdf) (2018).
- 651 84. Gadgeel, S. M. *et al.* Safety and activity of alectinib against systemic disease and brain  
652 metastases in patients with crizotinib-resistant ALK-rearranged non-small-cell lung cancer  
653 (AF-002JG): results from the dose-finding portion of a phase 1/2 study. *Lancet Oncol.* **15**,  
654 1119–1128 (2014).
- 655 85. Ghosal, K. *et al.* A randomized controlled study to evaluate the effect of bexarotene on  
656 amyloid- $\beta$  and apolipoprotein E metabolism in healthy subjects. *Alzheimers Dement.*  
657 *Transl. Res. Clin. Interv.* **2**, 110–120 (2016).
- 658 86. Gojo, I. *et al.* Phase 1 and pharmacologic study of MS-275, a histone deacetylase inhibitor,  
659 in adults with refractory and relapsed acute leukemias. *Blood* **109**, 2781–2790 (2007).

- 660 87. Gueorguieva, I. *et al.* Relative bioavailability of three formulations of galunisertib  
661 administered as monotherapy in patients with advanced or metastatic cancer. *Drugs*  
662 *Context* **5**, 212303 (2016).
- 663 88. Hexner, E. *et al.* Open-label study of oral CEP-701 (lestaurtinib) in patients with  
664 polycythaemia vera or essential thrombocythaemia with JAK2-V617F mutation. *Br. J.*  
665 *Haematol.* **164**, 83–93 (2014).
- 666 89. Holen, K., Saltz, L. B., Hollywood, E., Burk, K. & Hanauske, A.-R. The pharmacokinetics,  
667 toxicities, and biologic effects of FK866, a nicotinamide adenine dinucleotide biosynthesis  
668 inhibitor. *Invest. New Drugs* **26**, 45–51 (2008).
- 669 90. Howell, S. B., Schiefer, M., Andrews, P. A., Markman, M. & Abramson, I. The  
670 pharmacology of intraperitoneally administered bleomycin. *J. Clin. Oncol.* **5**, 2009–2016  
671 (1987).
- 672 91. Huang, L., Lizak, P., Dvorak, C. C., Aweeka, F. & Long-Boyle, J. Simultaneous  
673 determination of fludarabine and clofarabine in human plasma by LC-MS/MS. *J.*  
674 *Chromatogr. B Analyt. Technol. Biomed. Life. Sci.* **960**, 194–199 (2014).
- 675 92. Ikeda, M. *et al.* Safety and Pharmacokinetics of Lenvatinib in Patients with Advanced  
676 Hepatocellular Carcinoma. *Clin. Cancer Res.* **22**, 1385–1394 (2016).
- 677 93. Jin, F., Robeson, M., Zhou, H., Hisoire, G. & Ramanathan, S. The pharmacokinetics and  
678 safety of idelalisib in subjects with moderate or severe hepatic impairment. *J. Clin.*  
679 *Pharmacol.* **55**, 944–952 (2015).
- 680 94. de Jong, J. *et al.* The effect of food on the pharmacokinetics of oral ibrutinib in healthy  
681 participants and patients with chronic lymphocytic leukemia. *Cancer Chemother.*  
682 *Pharmacol.* **75**, 907–916 (2015).
- 683 95. Kantarjian, H. M. *et al.* Phase I study assessing the safety and tolerability of barasertib  
684 (AZD1152) with low-dose cytosine arabinoside in elderly patients with AML. *Clin.*  
685 *Lymphoma Myeloma Leuk.* **13**, 559–567 (2013).
- 686 96. Kovarik, J. M. *et al.* Oral-intravenous crossover study of fingolimod pharmacokinetics,  
687 lymphocyte responses and cardiac effects. *Biopharm. Drug Dispos.* **28**, 97–104 (2007).
- 688 97. Lacy, S. A., Miles, D. R. & Nguyen, L. T. Clinical Pharmacokinetics and  
689 Pharmacodynamics of Cabozantinib. *Clin. Pharmacokinet.* **56**, 477–491 (2017).
- 690 98. Lee, S. *et al.* Relative Bioavailability and Tolerability of Two Formulations of Bicalutamide  
691 50-mg Tablets: A Randomized-Sequence, Open-Label, Two-Period Crossover Study in  
692 Healthy Korean Male Subjects. *Clin. Ther.* **32**, 2496–2501 (2010).

- 693 99. Macaulay, V. M. *et al.* Phase I Dose-Escalation Study of Linsitinib (OSI-906) and Erlotinib  
694 in Patients with Advanced Solid Tumors. *Clin. Cancer Res. Off. J. Am. Assoc. Cancer Res.*  
695 **22**, 2897–2907 (2016).
- 696 100. Marumo, A., Miyawaki, S., Dan, N. & Ishiyama, K. Plasma Concentration of Itraconazole in  
697 Patients With Hematologic Malignancies Treated With Itraconazole Oral Solution. *Ther.*  
698 *Drug Monit.* **39**, 229–234 (2017).
- 699 101. Mekhail, T. *et al.* Metabolism, Excretion, and Pharmacokinetics of Oral Brivanib in Patients  
700 with Advanced or Metastatic Solid Tumors. *Drug Metab. Dispos.* **38**, 1962–1966 (2010).
- 701 102. Minami, H. *et al.* Phase I, multicenter, open-label, dose-escalation study of sonidegib in  
702 Asian patients with advanced solid tumors. *Cancer Sci.* **107**, 1477–1483 (2016).
- 703 103. Minden, M. D. *et al.* Oral ciclopirox olamine displays biological activity in a phase I study in  
704 patients with advanced hematologic malignancies. *Am. J. Hematol.* **89**, 363–368 (2014).
- 705 104. Mross, K. *et al.* A phase I clinical and pharmacokinetic study of the camptothecin  
706 glycoconjugate, BAY 38-3441, as a daily infusion in patients with advanced solid tumors.  
707 *Ann. Oncol.* **15**, 1284–1294 (2004).
- 708 105. Mukai, M. *et al.* Effects of Rifampin on the Pharmacokinetics of a Single Dose of  
709 Istradefylline in Healthy Subjects. *J. Clin. Pharmacol.* **58**, 193–201 (2018).
- 710 106. Mukohara, T., Nagai, S., Koshiji, M., Yoshizawa, K. & Minami, H. Phase I dose escalation  
711 and pharmacokinetic study of oral enzastaurin (LY317615) in advanced solid tumors.  
712 *Cancer Sci.* **101**, 2193–2199 (2010).
- 713 107. Nemunaitis, J. J. *et al.* A first-in-human, phase 1, dose-escalation study of dinaciclib, a  
714 novel cyclin-dependent kinase inhibitor, administered weekly in subjects with advanced  
715 malignancies. *J. Transl. Med.* **11**, 259 (2013).
- 716 108. Ogura, M. *et al.* Phase I and pharmacokinetic study of bendamustine hydrochloride in  
717 relapsed or refractory indolent B-cell non-Hodgkin lymphoma and mantle cell lymphoma.  
718 *Cancer Sci.* **101**, 2054–2058 (2010).
- 719 109. Oki, Y. *et al.* Phase I/II study of decitabine in patients with myelodysplastic syndrome: A  
720 multi-center study in Japan. *Cancer Sci.* **103**, 1839–1847 (2012).
- 721 110. Park, Y. B., Kim, H. S., Oh, J. H. & Lee, S. H. The co-expression of p53 protein and P-  
722 glycoprotein is correlated to a poor prognosis in osteosarcoma. *Int. Orthop.* **24**, 307–310  
723 (2001).

- 724 111. Peng, B. *et al.* Pharmacokinetics and Pharmacodynamics of Imatinib in a Phase I Trial  
725 With Chronic Myeloid Leukemia Patients. *J. Clin. Oncol.* **22**, 935–942 (2004).
- 726 112. Robertson, J. F. R. *et al.* Pharmacokinetic Profile of Intramuscular Fulvestrant in Advanced  
727 Breast Cancer. *Clin. Pharmacokinet.* **43**, 529–538 (2004).
- 728 113. Rodon, J. *et al.* A Phase Ib, open-label, dose-finding study of alpelisib in combination with  
729 paclitaxel in patients with advanced solid tumors. *Oncotarget* **9**, 31709–31718 (2018).
- 730 114. Saka, H. *et al.* Safety, tolerability and pharmacokinetics of the fibroblast growth factor  
731 receptor inhibitor AZD4547 in Japanese patients with advanced solid tumours: a Phase I  
732 study. *Invest. New Drugs* **35**, 451–462 (2017).
- 733 115. Salem, A. H., Koenig, D. & Carlson, D. Pooled Population Pharmacokinetic Analysis of  
734 Phase I, II and III Studies of Linifanib in Cancer Patients. *Clin. Pharmacokinet.* **53**, 347–  
735 359 (2014).
- 736 116. Silvennoinen, R., Malminiemi, K., Malminiemi, O., Seppälä, E. & Vilpo, J.  
737 Pharmacokinetics of chlorambucil in patients with chronic lymphocytic leukaemia:  
738 comparison of different days, cycles and doses. *Pharmacol. Toxicol.* **87**, 223–228 (2000).
- 739 117. Simon, G. R. *et al.* Increased Bioavailability of Intravenous Versus Oral CI-1033, a Pan  
740 erbB Tyrosine Kinase Inhibitor: Results of a Phase I Pharmacokinetic Study. *Clin. Cancer*  
741 *Res.* **12**, 4645–4651 (2006).
- 742 118. Steele, N. L. *et al.* Pharmacokinetic and pharmacodynamic properties of an oral  
743 formulation of the histone deacetylase inhibitor Belinostat (PXD101). *Cancer Chemother.*  
744 *Pharmacol.* **67**, 1273–1279 (2011).
- 745 119. Sun, J. X. *et al.* Comparative pharmacokinetics of lovastatin extended-release tablets and  
746 lovastatin immediate-release tablets in humans. *J. Clin. Pharmacol.* **42**, 198–204 (2002).
- 747 120. Tsimberidou, A. M. *et al.* Phase I study of azacitidine and oxaliplatin in patients with  
748 advanced cancers that have relapsed or are refractory to any platinum therapy. *Clin.*  
749 *Epigenetics* **7**, 29 (2015).
- 750 121. Tsutsumi, H. *et al.* [Plasma concentration of cytosine arabinoside (Ara-C) in the elderly  
751 patients with hematological malignancy treated by Ara-C or cytarabine ocfosfate (SPAC)].  
752 *Nihon Ronen Igakkai Zasshi Jpn. J. Geriatr.* **32**, 190–194 (1995).
- 753 122. Wind, S., Schmid, M., Erhardt, J., Goeldner, R.-G. & Stopfer, P. Pharmacokinetics of  
754 Afatinib, a Selective Irreversible ErbB Family Blocker, in Patients with Advanced Solid  
755 Tumours. *Clin. Pharmacokinet.* **52**, 1101–1109 (2013).

- 756 123. Yamamoto, N. *et al.* Phase I, dose escalation and pharmacokinetic study of cediranib  
757 (RECENTIN™), a highly potent and selective VEGFR signaling inhibitor, in Japanese  
758 patients with advanced solid tumors. *Cancer Chemother. Pharmacol.* **64**, 1165–1172  
759 (2009).
- 760 124. Zhang, M. *et al.* A randomized, placebo-controlled study of the pharmacokinetics,  
761 pharmacodynamics, and tolerability of the oral JAK2 inhibitor fedratinib (SAR302503) in  
762 healthy volunteers. *J. Clin. Pharmacol.* **54**, 415–421 (2014).
- 763 125. Aoki, T. *et al.* Pharmacokinetic study of temozolomide on a daily-for-5-days schedule in  
764 Japanese patients with relapsed malignant gliomas: first study in Asians. *Int. J. Clin. Oncol.*  
765 **12**, 341–349 (2007).
- 766 126. Bergman, A. *et al.* Absolute bioavailability of sitagliptin, an oral dipeptidyl peptidase-4  
767 inhibitor, in healthy volunteers. *Biopharm. Drug Dispos.* **28**, 315–322 (2007).
- 768 127. Blumenschein, G. R. *et al.* Phase 1b Study of Motesanib, an Oral Angiogenesis Inhibitor, in  
769 Combination with Carboplatin/Paclitaxel and/or Panitumumab for the Treatment of  
770 Advanced Non–Small Cell Lung Cancer. *Clin. Cancer Res.* **16**, 279–290 (2010).
- 771 128. de Bono, J. *et al.* Phase I, Dose-Escalation, Two-Part Trial of the PARP Inhibitor  
772 Talazoparib in Patients with Advanced Germline BRCA1/2 Mutations and Selected  
773 Sporadic Cancers. *Cancer Discov.* **7**, 620–629 (2017).
- 774 129. Canal, P. *et al.* Pharmacokinetics of teniposide (VM 26) after IV administration in serum  
775 and malignant ascites of patients with ovarian carcinoma. *Cancer Chemother. Pharmacol.*  
776 **15**, 149–152 (1985).
- 777 130. Choo, S. P. *et al.* A Phase 1 dose-finding and pharmacodynamic study of rapamycin in  
778 combination with bevacizumab in patients with unresectable hepatocellular carcinoma.  
779 *Eur. J. Cancer* **49**, 999–1008 (2013).
- 780 131. Chu, N.-N., Chen, W.-L., Xu, H.-R. & Li, X.-N. Pharmacokinetics and Safety of  
781 Ezetimibe/Simvastatin Combination Tablet. *Clin. Drug Investig.* **32**, 791–798 (2012).
- 782 132. Conley, B. A. *et al.* Phase I clinical trial of all-trans-retinoic acid with correlation of its  
783 pharmacokinetics and pharmacodynamics. *Cancer Chemother. Pharmacol.* **39**, 291–299  
784 (1997).
- 785 133. Do, K. *et al.* Phase I Study of Single-Agent AZD1775 (MK-1775), a Wee1 Kinase Inhibitor,  
786 in Patients With Refractory Solid Tumors. *J. Clin. Oncol.* **33**, 3409–3415 (2015).
- 787 134. Dolan, M. E. *et al.* O6-benzylguanine in humans: metabolic, pharmacokinetic, and  
788 pharmacodynamic findings. *J. Clin. Oncol.* **16**, 1803–1810 (1998).

- 789 135. Fishman, M. N. *et al.* Phase Ib study of tivozanib (AV-951) in combination with  
790 temsirolimus in patients with renal cell carcinoma. *Eur. J. Cancer Oxf. Engl.* 1990 **49**,  
791 2841–2850 (2013).
- 792 136. Fujisaka, Y. *et al.* First report of the safety, tolerability, and pharmacokinetics of the Src  
793 kinase inhibitor saracatinib (AZD0530) in Japanese patients with advanced solid tumours.  
794 *Invest. New Drugs* **31**, 108–114 (2013).
- 795 137. Gandhi, V. *et al.* Compound GW506U78 in refractory hematologic malignancies:  
796 relationship between cellular pharmacokinetics and clinical response. *J. Clin. Oncol.* **16**,  
797 3607–3615 (1998).
- 798 138. Graham, R. A. *et al.* Pharmacokinetics of Hedgehog Pathway Inhibitor Vismodegib (GDC-  
799 0449) in Patients with Locally Advanced or Metastatic Solid Tumors: the Role of Alpha-1-  
800 Acid Glycoprotein Binding. *Clin. Cancer Res. Off. J. Am. Assoc. Cancer Res.* **17**, 2512–  
801 2520 (2011).
- 802 139. Grippo, J. F. *et al.* A phase I, randomized, open-label study of the multiple-dose  
803 pharmacokinetics of vemurafenib in patients with BRAFV600Emutation-positive metastatic  
804 melanoma. *Cancer Chemother. Pharmacol.* **73**, 103–111 (2014).
- 805 140. Grossman, S. A. *et al.* The Effect of Enzyme-Inducing Antiseizure Drugs on the  
806 Pharmacokinetics and Tolerability of Procarbazine Hydrochloride. *Clin. Cancer Res.* **12**,  
807 5174–5181 (2006).
- 808 141. Gupta, N. *et al.* Pharmacokinetics of ixazomib, an oral proteasome inhibitor, in solid tumour  
809 patients with moderate or severe hepatic impairment. *Br. J. Clin. Pharmacol.* **82**, 728–738  
810 (2016).
- 811 142. Hamberg, P. *et al.* Pazopanib exposure decreases as a result of an ifosfamide-dependent  
812 drug–drug interaction: results of a phase I study. *Br. J. Cancer* **110**, 888–893 (2014).
- 813 143. He, H. *et al.* Midostaurin, a Novel Protein Kinase Inhibitor for the Treatment of Acute  
814 Myelogenous Leukemia: Insights from Human Absorption, Metabolism, and Excretion  
815 Studies of a BDDCS II Drug. *Drug Metab. Dispos.* **45**, 540–555 (2017).
- 816 144. Hwang, J. J. *et al.* Phase I Dose Finding Studies of Obatoclax (GX15-070), a Small  
817 Molecule Pan-BCL-2 Family Antagonist, in Patients with Advanced Solid Tumors or  
818 Lymphoma. *Clin. Cancer Res. Off. J. Am. Assoc. Cancer Res.* **16**, 4038–4045 (2010).
- 819 145. Isah, A. O., Rawlins, M. D. & Bateman, D. N. Clinical pharmacology of prochlorperazine in  
820 healthy young males. *Br. J. Clin. Pharmacol.* **32**, 677–684 (1991).

- 821 146. Kisanga, E. R. *et al.* Tamoxifen and Metabolite Concentrations in Serum and Breast  
822 Cancer Tissue during Three Dose Regimens in a Randomized Preoperative Trial. *Clin.*  
823 *Cancer Res.* **10**, 2336–2343 (2004).
- 824 147. Kitzen, J. J. E. M. *et al.* Phase I dose-escalation study of F60008, a novel apoptosis  
825 inducer, in patients with advanced solid tumours. *Eur. J. Cancer* **45**, 1764–1772 (2009).
- 826 148. Kosoglou, T. *et al.* Pharmacodynamics and pharmacokinetics of the novel PAR-1  
827 antagonist vorapaxar (formerly SCH 530348) in healthy subjects. *Eur. J. Clin. Pharmacol.*  
828 **68**, 249–258 (2012).
- 829 149. Kuhn, J. G. *et al.* Pharmacokinetic and Tumor Distribution Characteristics of Temsirolimus  
830 in Patients with Recurrent Malignant Glioma. *Clin. Cancer Res. Off. J. Am. Assoc. Cancer*  
831 *Res.* **13**, 7401–7406 (2007).
- 832 150. Leijen, S. *et al.* A phase I, open-label, randomized crossover study to assess the effect of  
833 dosing of the MEK 1/2 inhibitor Selumetinib (AZD6244; ARRY-142866) in the presence  
834 and absence of food in patients with advanced solid tumors. *Cancer Chemother.*  
835 *Pharmacol.* **68**, 1619–1628 (2011).
- 836 151. Liu, Y.-M. *et al.* Pharmacokinetic Properties and Bioequivalence of Two  
837 Sulfadoxine/Pyrimethamine Fixed-Dose Combination Tablets: A Parallel-Design Study in  
838 Healthy Chinese Male Volunteers. *Clin. Ther.* **34**, 2212–2220 (2012).
- 839 152. LoConte, N. K. *et al.* A Multicenter Phase 1 Study of  $\gamma$ -secretase inhibitor RO4929097 in  
840 Combination with Capecitabine in Refractory Solid Tumors. *Invest. New Drugs* **33**, 169–  
841 176 (2015).
- 842 153. Lu, K., Yap, H.-Y. & Loo, T. L. Clinical Pharmacokinetics of Vinblastine by Continuous  
843 Intravenous Infusion. *Cancer Res.* **43**, 1405–1408 (1983).
- 844 154. Melichar, B. *et al.* Clinical activity of patupilone in patients with pretreated  
845 advanced/metastatic colon cancer: results of a phase I dose escalation trial. *Br. J. Cancer*  
846 **105**, 1646–1653 (2011).
- 847 155. Midha, K. K. *et al.* Kinetics of oral trifluoperazine disposition in man. *Br. J. Clin. Pharmacol.*  
848 **15**, 380–382 (1983).
- 849 156. Mross, K. *et al.* A Phase I Dose–Escalation Study of Regorafenib (BAY 73–4506), an  
850 Inhibitor of Oncogenic, Angiogenic, and Stromal Kinases, in Patients with Advanced Solid  
851 Tumors. *Clin. Cancer Res.* **18**, 2658–2667 (2012).
- 852 157. Muralidharan, G., Micalizzi, M., Speth, J., Raible, D. & Troy, S. Pharmacokinetics of  
853 Tigecycline after Single and Multiple Doses in Healthy Subjects. *Antimicrob. Agents*  
854 *Chemother.* **49**, 220–229 (2005).

- 855 158. Narasimhan, N. I., Dorer, D. J., Niland, K., Haluska, F. & Sonnichsen, D. Effects of  
856 Ketoconazole on the Pharmacokinetics of Ponatinib in Healthy Subjects. *J. Clin.*  
857 *Pharmacol.* **53**, 974–981 (2013).
- 858 159. Nichols, D. J., Muirhead, G. J. & Harness, J. A. Pharmacokinetics of sildenafil after single  
859 oral doses in healthy male subjects: absolute bioavailability, food effects and dose  
860 proportionality. *Br. J. Clin. Pharmacol.* **53**, 5S-12S (2002).
- 861 160. Nijenhuis, C. M. *et al.* Pharmacokinetics and excretion of <sup>14</sup>C-omacetaxine in patients with  
862 advanced solid tumors. *Invest. New Drugs* **34**, 565–574 (2016).
- 863 161. Patnaik, A. *et al.* A Phase I, Pharmacokinetic, and Biological Study of the  
864 Farnesyltransferase Inhibitor Tipifarnib in Combination with Gemcitabine in Patients with  
865 Advanced Malignancies. *Clin. Cancer Res.* **9**, 4761–4771 (2003).
- 866 162. Prakash, S. *et al.* Chronic Oral Administration of CI-994: A Phase I Study. *Invest. New*  
867 *Drugs* **19**, 1–11 (2001).
- 868 163. Ramalingam, S. S. *et al.* Phase I and Pharmacokinetic Study of Vorinostat, A Histone  
869 Deacetylase Inhibitor, in Combination with Carboplatin and Paclitaxel for Advanced Solid  
870 Malignancies. *Clin. Cancer Res.* **13**, 3605–3610 (2007).
- 871 164. Richardson, P. G. *et al.* Tanespimycin monotherapy in relapsed multiple myeloma: results  
872 of a phase 1 dose-escalation study. *Br. J. Haematol.* **150**, 438–445 (2010).
- 873 165. Sandmaier, B. M. *et al.* Results of a phase 1 study of quizartinib as maintenance therapy in  
874 subjects with acute myeloid leukemia in remission following allogeneic hematopoietic stem  
875 cell transplant. *Am. J. Hematol.* **93**, 222–231 (2018).
- 876 166. Savelieva, M. *et al.* Population pharmacokinetics of intravenous and oral panobinostat in  
877 patients with hematologic and solid tumors. *Eur. J. Clin. Pharmacol.* **71**, 663–672 (2015).
- 878 167. Schilcher, R. B., Young, J. D., Ratanatharathorn, V., Karanes, C. & Baker, L. H. Clinical  
879 pharmacokinetics of high-dose mitomycin C. *Cancer Chemother. Pharmacol.* **13**, 186–190  
880 (1984).
- 881 168. Schweizer, M. T. *et al.* A phase I study of niclosamide in combination with enzalutamide in  
882 men with castration-resistant prostate cancer. *PLoS ONE* **13**, e0198389 (2018).
- 883 169. Selden, R., Smith, T. W. & Findley, W. Ouabain Pharmacokinetics in Dog and Man.  
884 *Circulation* **45**, 1176–1182 (1972).
- 885 170. Sethi, V. S. *et al.* Pharmacokinetics of Vincristine Sulfate in Adult Cancer Patients. *Cancer*  
886 *Res.* **41**, 3551–3555 (1981).



- 887 171. Shapiro, G. I. *et al.* Pharmacokinetic Study of Rucaparib in Patients With Advanced Solid  
888 Tumors. *Clin. Pharmacol. Drug Dev.* **8**, 107–118 (2019).
- 889 172. Sikma, M. A. *et al.* Pharmacokinetics and Toxicity of Tacrolimus Early After Heart and  
890 Lung Transplantation: Tacrolimus Pharmacokinetics Posttransplant. *Am. J. Transplant.* **15**,  
891 2301–2313 (2015).
- 892 173. Tamura, K. *et al.* Phase I study of palbociclib, a cyclin-dependent kinase 4/6 inhibitor, in  
893 Japanese patients. *Cancer Sci.* **107**, 755–763 (2016).
- 894 174. Tanaka, C. *et al.* Clinical Pharmacokinetics of the BCR–ABL Tyrosine Kinase Inhibitor  
895 Nilotinib. *Clin. Pharmacol. Ther.* **87**, 197–203 (2010).
- 896 175. Tomkinson, H. *et al.* Pharmacokinetics and tolerability of zibotentan (ZD4054) in subjects  
897 with hepatic or renal impairment: two open-label comparative studies. *BMC Clin.*  
898 *Pharmacol.* **11**, 3 (2011).
- 899 176. Verstovsek, S., Yeleswaram, S., Hou, K., Chen, X. & Erickson-Viitanen, S. Sustained-  
900 release ruxolitinib: Findings from a phase 1 study in healthy subjects and a phase 2 study  
901 in patients with myelofibrosis. *Hematol. Oncol.* **36**, 701–708 (2018).
- 902 177. Willis, B. A. *et al.* Semagacestat Pharmacokinetics Are Not Significantly Affected by  
903 Formulation, Food, or Time of Dosing in Healthy Participants. *J. Clin. Pharmacol.* **52**, 904–  
904 913 (2012).
- 905 178. Wilson, W. H. *et al.* Safety, Pharmacokinetics, Pharmacodynamics, and Activity of  
906 Navitoclax, a Targeted High Affinity Inhibitor of BCL-2, in Lymphoid Malignancies. *Lancet*  
907 *Oncol.* **11**, 1149–1159 (2010).
- 908 179. Xin, Y. *et al.* The Relative Bioavailability, Food Effect, and Drug Interaction With  
909 Omeprazole of Momelotinib Tablet Formulation in Healthy Subjects. *Clin. Pharmacol. Drug*  
910 *Dev.* **7**, 277–286 (2018).
- 911 180. Albain, K. S. *et al.* A Randomized Trial of Adjuvant Chemotherapy and Tamoxifen Timing  
912 in Postmenopausal, Endocrine-Responsive, Node-Positive Breast Cancer. *Lancet* **374**,  
913 2055–2063 (2009).
- 914 181. Araujo, J. C. *et al.* Docetaxel and dasatinib or placebo in men with metastatic castration-  
915 resistant prostate cancer (READY): a randomised, double-blind phase 3 trial. *Lancet*  
916 *Oncol.* **14**, 1307–1316 (2013).
- 917 182. Bajetta, E. *et al.* Randomized trial on adjuvant treatment with FOLFIRI followed by  
918 docetaxel and cisplatin versus 5-fluorouracil and folinic acid for radically resected gastric  
919 cancer. *Ann. Oncol.* **25**, 1373–1378 (2014).

- 920 183. Bear, H. D. *et al.* Sequential Preoperative or Postoperative Docetaxel Added to  
921 Preoperative Doxorubicin Plus Cyclophosphamide for Operable Breast Cancer: National  
922 Surgical Adjuvant Breast and Bowel Project Protocol B-27. *J. Clin. Oncol.* **24**, 2019–2027  
923 (2006).
- 924 184. Bellmunt, J. *et al.* Randomized Phase III Study Comparing Paclitaxel/Cisplatin/  
925 Gemcitabine and Gemcitabine/Cisplatin in Patients With Locally Advanced or Metastatic  
926 Urothelial Cancer Without Prior Systemic Therapy: EORTC Intergroup Study 30987. *J.*  
927 *Clin. Oncol.* **30**, 1107–1113 (2012).
- 928 185. du Bois, A. *et al.* Phase III trial of carboplatin plus paclitaxel with or without gemcitabine in  
929 first-line treatment of epithelial ovarian cancer. *J. Clin. Oncol. Off. J. Am. Soc. Clin. Oncol.*  
930 **28**, 4162–4169 (2010).
- 931 186. Carrato, A. *et al.* Fluorouracil, Leucovorin, and Irinotecan Plus Either Sunitinib or Placebo  
932 in Metastatic Colorectal Cancer: A Randomized, Phase III Trial. *J. Clin. Oncol.* **31**, 1341–  
933 1347 (2013).
- 934 187. Cavo, M. *et al.* Bortezomib-thalidomide-dexamethasone is superior to thalidomide-  
935 dexamethasone as consolidation therapy after autologous hematopoietic stem cell  
936 transplantation in patients with newly diagnosed multiple myeloma. *Blood* **120**, 9–19  
937 (2012).
- 938 188. Colucci, G. *et al.* Randomized Phase III Trial of Gemcitabine Plus Cisplatin Compared With  
939 Single-Agent Gemcitabine As First-Line Treatment of Patients With Advanced Pancreatic  
940 Cancer: The GIP-1 Study. *J. Clin. Oncol.* **28**, 1645–1651 (2010).
- 941 189. Di Leo, A. *et al.* Phase III, Double-Blind, Randomized Study Comparing Lapatinib Plus  
942 Paclitaxel With Placebo Plus Paclitaxel As First-Line Treatment for Metastatic Breast  
943 Cancer. *J. Clin. Oncol.* **26**, 5544–5552 (2008).
- 944 190. Douillard, J. *et al.* Irinotecan combined with fluorouracil compared with fluorouracil alone as  
945 first-line treatment for metastatic colorectal cancer: a multicentre randomised trial. *The*  
946 *Lancet* **355**, 1041–1047 (2000).
- 947 191. Dueñas-González, A. *et al.* Phase III, Open-Label, Randomized Study Comparing  
948 Concurrent Gemcitabine Plus Cisplatin and Radiation Followed by Adjuvant Gemcitabine  
949 and Cisplatin Versus Concurrent Cisplatin and Radiation in Patients With Stage IIB to IVA  
950 Carcinoma of the Cervix. *J. Clin. Oncol.* **29**, 1678–1685 (2011).
- 951 192. Falcone, A. *et al.* Phase III Trial of Infusional Fluorouracil, Leucovorin, Oxaliplatin, and  
952 Irinotecan (FOLFOXIRI) Compared With Infusional Fluorouracil, Leucovorin, and Irinotecan  
953 (FOLFIRI) As First-Line Treatment for Metastatic Colorectal Cancer: The Gruppo  
954 Oncologico Nord Ovest. *J. Clin. Oncol.* **25**, 1670–1676 (2007).

- 955 193. Flaherty, K. T. *et al.* Phase III Trial of Carboplatin and Paclitaxel With or Without Sorafenib  
956 in Metastatic Melanoma. *J. Clin. Oncol.* **31**, 373–379 (2013).
- 957 194. Gatzemeier, U. *et al.* Phase III Study of Erlotinib in Combination With Cisplatin and  
958 Gemcitabine in Advanced Non–Small-Cell Lung Cancer: The Tarceva Lung Cancer  
959 Investigation Trial. *J. Clin. Oncol.* **25**, 1545–1552 (2007).
- 960 195. Giaccone, G. *et al.* Gefitinib in Combination With Gemcitabine and Cisplatin in Advanced  
961 Non–Small-Cell Lung Cancer: A Phase III Trial—INTACT 1. *J. Clin. Oncol.* **22**, 777–784  
962 (2004).
- 963 196. Gianni, L. *et al.* Phase III Trial Evaluating the Addition of Paclitaxel to Doxorubicin  
964 Followed by Cyclophosphamide, Methotrexate, and Fluorouracil, As Adjuvant or Primary  
965 Systemic Therapy: European Cooperative Trial in Operable Breast Cancer. *J. Clin. Oncol.*  
966 **27**, 2474–2481 (2009).
- 967 197. Gill, S. *et al.* PANCREOX: A Randomized Phase III Study of Fluorouracil/Leucovorin With  
968 or Without Oxaliplatin for Second-Line Advanced Pancreatic Cancer in Patients Who Have  
969 Received Gemcitabine-Based Chemotherapy. *J. Clin. Oncol.* **34**, 3914–3920 (2016).
- 970 198. Haller, D. G. *et al.* Oxaliplatin Plus Irinotecan Compared With Irinotecan Alone as Second-  
971 Line Treatment After Single-Agent Fluoropyrimidine Therapy for Metastatic Colorectal  
972 Carcinoma. *J. Clin. Oncol.* **26**, 4544–4550 (2008).
- 973 199. Hanna, N. *et al.* Phase III Study of Cisplatin, Etoposide, and Concurrent Chest Radiation  
974 With or Without Consolidation Docetaxel in Patients With Inoperable Stage III Non–Small-  
975 Cell Lung Cancer: The Hoosier Oncology Group and U.S. Oncology. *J. Clin. Oncol.* **26**,  
976 5755–5760 (2008).
- 977 200. Hauschild, A. *et al.* Results of a Phase III, Randomized, Placebo-Controlled Study of  
978 Sorafenib in Combination With Carboplatin and Paclitaxel As Second-Line Treatment in  
979 Patients With Unresectable Stage III or Stage IV Melanoma. *J. Clin. Oncol.* **27**, 2823–2830  
980 (2009).
- 981 201. Herbst, R. S. *et al.* Gefitinib in Combination With Paclitaxel and Carboplatin in Advanced  
982 Non–Small-Cell Lung Cancer: A Phase III Trial—INTACT 2. *J. Clin. Oncol.* **22**, 785–794  
983 (2004).
- 984 202. Herbst, R. S. *et al.* TRIBUTE: A Phase III Trial of Erlotinib Hydrochloride (OSI-774)  
985 Combined With Carboplatin and Paclitaxel Chemotherapy in Advanced Non–Small-Cell  
986 Lung Cancer. *J. Clin. Oncol.* **23**, 5892–5899 (2005).
- 987 203. Herbst, R. S. *et al.* Vandetanib plus docetaxel versus docetaxel as second-line treatment  
988 for patients with advanced non-small-cell lung cancer (ZODIAC): a double-blind,  
989 randomised, phase 3 trial. *Lancet Oncol.* **11**, 619–626 (2010).

- 990 204. Homesley, H. D. *et al.* Phase III Trial of Ifosfamide With or Without Paclitaxel in Advanced  
991 Uterine Carcinosarcoma: A Gynecologic Oncology Group Study. *J. Clin. Oncol.* **25**, 526–  
992 531 (2007).
- 993 205. Kindler, H. L. *et al.* Axitinib plus gemcitabine versus placebo plus gemcitabine in patients  
994 with advanced pancreatic adenocarcinoma: a double-blind randomised phase 3 study.  
995 *Lancet Oncol.* **12**, 256–262 (2011).
- 996 206. Köhne, C.-H. *et al.* Phase III Study of Weekly High-Dose Infusional Fluorouracil Plus  
997 Folinic Acid With or Without Irinotecan in Patients With Metastatic Colorectal Cancer:  
998 European Organisation for Research and Treatment of Cancer Gastrointestinal Group  
999 Study 40986. *J. Clin. Oncol.* **23**, 4856–4865 (2005).
- 1000 207. Kubota, K. *et al.* Etoposide and cisplatin versus irinotecan and cisplatin in patients with  
1001 limited-stage small-cell lung cancer treated with etoposide and cisplatin plus concurrent  
1002 accelerated hyperfractionated thoracic radiotherapy (JCOG0202): a randomised phase 3  
1003 study. *Lancet Oncol.* **15**, 106–113 (2014).
- 1004 208. Kudo, M. *et al.* Sorafenib plus low-dose cisplatin and fluorouracil hepatic arterial infusion  
1005 chemotherapy versus sorafenib alone in patients with advanced hepatocellular carcinoma  
1006 (SILIUS): a randomised, open label, phase 3 trial. *Lancet Gastroenterol. Hepatol.* **3**, 424–  
1007 432 (2018).
- 1008 209. Lee, J. *et al.* Gemcitabine and oxaliplatin with or without erlotinib in advanced biliary-tract  
1009 cancer: a multicentre, open-label, randomised, phase 3 study. *Lancet Oncol.* **13**, 181–188  
1010 (2012).
- 1011 210. Lee, S. M. *et al.* Anti-angiogenic Therapy Using Thalidomide Combined With  
1012 Chemotherapy in Small Cell Lung Cancer: A Randomized, Double-Blind, Placebo-  
1013 Controlled Trial. *JNCI J. Natl. Cancer Inst.* **101**, 1049–1057 (2009).
- 1014 211. Lilenbaum, R. C. *et al.* Single-Agent Versus Combination Chemotherapy in Advanced  
1015 Non-Small-Cell Lung Cancer: The Cancer and Leukemia Group B (study 9730). *J. Clin.*  
1016 *Oncol.* **23**, 190–196 (2005).
- 1017 212. Martín, M. *et al.* Gemcitabine plus vinorelbine versus vinorelbine monotherapy in patients  
1018 with metastatic breast cancer previously treated with anthracyclines and taxanes: final  
1019 results of the phase III Spanish Breast Cancer Research Group (GEICAM) trial. *Lancet*  
1020 *Oncol.* **8**, 219–225 (2007).
- 1021 213. Moore, M. J. *et al.* Erlotinib plus gemcitabine compared with gemcitabine alone in patients  
1022 with advanced pancreatic cancer: a phase III trial of the National Cancer Institute of  
1023 Canada Clinical Trials Group. *J. Clin. Oncol. Off. J. Am. Soc. Clin. Oncol.* **25**, 1960–1966  
1024 (2007).

- 1025 214. Morabito, A. *et al.* Randomized phase III trial of gemcitabine and cisplatin vs. gemcitabine  
1026 alone in patients with advanced non-small cell lung cancer and a performance status of 2:  
1027 the CAPPA-2 study. *Lung Cancer Amst. Neth.* **81**, 77–83 (2013).
- 1028 215. Moreau, P. *et al.* Bortezomib plus dexamethasone versus reduced-dose bortezomib,  
1029 thalidomide plus dexamethasone as induction treatment before autologous stem cell  
1030 transplantation in newly diagnosed multiple myeloma. *Blood* **118**, 5752–5758 (2011).
- 1031 216. Muggia, F. M. *et al.* Phase III Randomized Study of Cisplatin Versus Paclitaxel Versus  
1032 Cisplatin and Paclitaxel in Patients With Suboptimal Stage III or IV Ovarian Cancer: A  
1033 Gynecologic Oncology Group Study. *J. Clin. Oncol.* **18**, 106–106 (2000).
- 1034 217. Niesvizky, R. *et al.* Community-Based Phase IIIB Trial of Three UPFRONT Bortezomib-  
1035 Based Myeloma Regimens. *J. Clin. Oncol.* **33**, 3921–3929 (2015).
- 1036 218. O’Neil, B. H. *et al.* A phase II/III randomized study to compare the efficacy and safety of  
1037 rigosertib plus gemcitabine versus gemcitabine alone in patients with previously untreated  
1038 metastatic pancreatic cancer. *Ann. Oncol.* **26**, 1923–1929 (2015).
- 1039 219. Orłowski, R. Z. *et al.* Randomized Phase III Study of Pegylated Liposomal Doxorubicin  
1040 Plus Bortezomib Compared With Bortezomib Alone in Relapsed or Refractory Multiple  
1041 Myeloma: Combination Therapy Improves Time to Progression. *J. Clin. Oncol.* **25**, 3892–  
1042 3901 (2007).
- 1043 220. O’Shaughnessy, J. *et al.* Superior Survival With Capecitabine Plus Docetaxel Combination  
1044 Therapy in Anthracycline-Pretreated Patients With Advanced Breast Cancer: Phase III  
1045 Trial Results. *J. Clin. Oncol.* **20**, 2812–2823 (2002).
- 1046 221. Paz-Ares, L. G. *et al.* Phase III, Randomized, Double-Blind, Placebo-Controlled Trial of  
1047 Gemcitabine/Cisplatin Alone or With Sorafenib for the First-Line Treatment of Advanced,  
1048 Nonsquamous Non–Small-Cell Lung Cancer. *J. Clin. Oncol.* **30**, 3084–3092 (2012).
- 1049 222. Perilongo, G. *et al.* Cisplatin versus Cisplatin plus Doxorubicin for Standard-Risk  
1050 Hepatoblastoma. *N. Engl. J. Med.* **361**, 1662–1670 (2009).
- 1051 223. Pfisterer, J. *et al.* Randomized Phase III Trial of Topotecan Following Carboplatin and  
1052 Paclitaxel in First-line Treatment of Advanced Ovarian Cancer: A Gynecologic Cancer  
1053 Intergroup Trial of the AGO-OVAR and GINECO. *JNCI J. Natl. Cancer Inst.* **98**, 1036–1045  
1054 (2006).
- 1055 224. Rosiñol, L. *et al.* Superiority of bortezomib, thalidomide, and dexamethasone (VTD) as  
1056 induction pretransplantation therapy in multiple myeloma: a randomized phase 3  
1057 PETHEMA/GEM study. *Blood* **120**, 1589–1596 (2012).

- 1058 225. San-Miguel, J. F. *et al.* Overall survival of patients with relapsed multiple myeloma treated  
1059 with panobinostat or placebo plus bortezomib and dexamethasone (the PANORAMA 1  
1060 trial): a randomised, placebo-controlled, phase 3 trial. *Lancet Haematol.* **3**, e506–e515  
1061 (2016).
- 1062 226. Scagliotti, G. *et al.* Phase III Study of Carboplatin and Paclitaxel Alone or With Sorafenib in  
1063 Advanced Non–Small-Cell Lung Cancer. *J. Clin. Oncol.* **28**, 1835–1842 (2010).
- 1064 227. Scagliotti, G. *et al.* Phase III Multinational, Randomized, Double-Blind, Placebo-Controlled  
1065 Study of Tivantinib (ARQ 197) Plus Erlotinib Versus Erlotinib Alone in Previously Treated  
1066 Patients With Locally Advanced or Metastatic Nonsquamous Non–Small-Cell Lung Cancer.  
1067 *J. Clin. Oncol.* **33**, 2667–2674 (2015).
- 1068 228. Swain, S. M. *et al.* Definitive Results of a Phase III Adjuvant Trial Comparing Three  
1069 Chemotherapy Regimens in Women With Operable, Node-Positive Breast Cancer: The  
1070 NSABP B-38 Trial. *J. Clin. Oncol.* **31**, 3197–3204 (2013).
- 1071 229. The ICON and AGO Collaborators. Paclitaxel plus platinum-based chemotherapy versus  
1072 conventional platinum-based chemotherapy in women with relapsed ovarian cancer: the  
1073 ICON4/AGO-OVAR-2.2 trial. *The Lancet* **361**, 2099–2106 (2003).
- 1074 230. Tsukada, H. *et al.* Randomized controlled trial comparing docetaxel–cisplatin combination  
1075 with weekly docetaxel alone in elderly patients with advanced non-small-cell lung cancer:  
1076 Japan Clinical Oncology Group (JCOG) 0207. *Jpn. J. Clin. Oncol.* **45**, 88–95 (2015).
- 1077 231. Valle, J. *et al.* Cisplatin plus gemcitabine versus gemcitabine for biliary tract cancer. *N.*  
1078 *Engl. J. Med.* **362**, 1273–1281 (2010).
- 1079 232. Van Cutsem, E. *et al.* Phase III Study of Docetaxel and Cisplatin Plus Fluorouracil  
1080 Compared With Cisplatin and Fluorouracil As First-Line Therapy for Advanced Gastric  
1081 Cancer: A Report of the V325 Study Group. *J. Clin. Oncol.* **24**, 4991–4997 (2006).
- 1082 233. Van Cutsem, E. *et al.* Randomized Phase III Trial Comparing Biweekly Infusional  
1083 Fluorouracil/Leucovorin Alone or With Irinotecan in the Adjuvant Treatment of Stage III  
1084 Colon Cancer: PETACC-3. *J. Clin. Oncol.* **27**, 3117–3125 (2009).
- 1085 234. Vermorken, J. B. *et al.* Cisplatin, Fluorouracil, and Docetaxel in Unresectable Head and  
1086 Neck Cancer. *N. Engl. J. Med.* **357**, 1695–1704 (2007).
- 1087 235. Von Hoff, D. D. *et al.* Increased Survival in Pancreatic Cancer with nab-Paclitaxel plus  
1088 Gemcitabine. *N. Engl. J. Med.* **369**, 1691–1703 (2013).
- 1089 236. Wu, Y.-L. *et al.* Intercalated combination of chemotherapy and erlotinib for patients with  
1090 advanced stage non-small-cell lung cancer (FASTACT-2): a randomised, double-blind trial.  
1091 *Lancet Oncol.* **14**, 777–786 (2013).

- 1092 237. Yoshioka, H. *et al.* A randomized, double-blind, placebo-controlled, phase III trial of  
1093 erlotinib with or without a c-Met inhibitor tivantinib (ARQ 197) in Asian patients with  
1094 previously treated stage IIIB/IV nonsquamous nonsmall-cell lung cancer harboring wild-  
1095 type epidermal growth factor receptor (ATTENTION study). *Ann. Oncol.* **26**, 2066–2072  
1096 (2015).
- 1097 238. Adler, D. *et al.* *rgl: 3D Visualization Using OpenGL*. (2017).
- 1098 239. Csárdi, G. & FitzJohn, R. *progress: Terminal Progress Bars*. (2016).
- 1099 240. Dragulescu, A. A. *xlsx: Read, write, format Excel 2007 and Excel 97/2000/XP/2003 files*.  
1100 (2014).
- 1101 241. Fox, J. & Weisberg, S. *An R Companion to Applied Regression*. (SAGE Publications,  
1102 2011).
- 1103 242. Gu, Z., Eils, R. & Schlesner, M. Complex heatmaps reveal patterns and correlations in  
1104 multidimensional genomic data. *Bioinformatics* **32**, 2847–2849 (2016).
- 1105 243. Neuwirth, E. *RColorBrewer: ColorBrewer Palettes*. (2014).
- 1106 244. Qiu, W., Chavarro, J., Lazarus, R., Rosner, B. & Ma, J. *powerSurvEpi: Power and Sample  
1107 Size Calculation for Survival Analysis of Epidemiological Studies*. (2015).
- 1108 245. R Core Team. *R: A Language and Environment for Statistical Computing*. (R Foundation  
1109 for Statistical Computing, 2017).
- 1110 246. Ritz, C., Baty, F., Streibig, J. C. & Gerhard, D. Dose-Response Analysis Using R. *PLoS  
1111 ONE* **10**, e0146021 (2015).
- 1112 247. Saito, T. & Rehmsmeier, M. Precrec: fast and accurate precision–recall and ROC curve  
1113 calculations in R. *Bioinformatics* **33**, 145–147 (2017).
- 1114 248. Schauburger, P. & Walker, A. *openxlsx: Read, Write and Edit xlsx Files*. (2019).
- 1115 249. Solymos, P. & Zawadzki, Z. *pbapply: Adding Progress Bar to ‘\*apply’ Functions*. (2017).
- 1116 250. Wickham, H. *rvest: Easily Harvest (Scrape) Web Pages*. (2016).
- 1117 251. Wickham, H. & Bryan, J. *readxl: Read Excel Files*. (2017).
- 1118 252. Wickham, H., Hester, J. & Francois, R. *readr: Read Rectangular Text Data*. (2017).

- 1119 253. Zeileis, A. Econometric Computing with HC and HAC Covariance Matrix Estimators. *J.*  
1120 *Stat. Softw.* **11**, 1–17 (2004).
- 1121 254. Zeileis, A. Object-oriented Computation of Sandwich Estimators. *J. Stat. Softw.* **16**, 1–16  
1122 (2006).
- 1123
- 1124
